# Supplementary material for: Resveratrol Alleviates Skeletal Muscle Insulin Resistance by Downregulating Long Noncoding RNA
Source: Hindawi journal article supplement (doi:10.1155/2022/2539519), 2022-01-19
Supplement: f1 [file 2539519.f1.zip]

# All\_differentially\_expressed\_mRNAs\_in\_the\_control\_HFD\_and\_HFD+RSV\_groups

| gene name | log2FC    | P-value  | updown (RHvs HD) | log2FC   | P-value  | updown (HD vs ND) |
|-----------|-----------|----------|------------------|----------|----------|-------------------|
| Slc22a18  | 1.1337055 | 0.037414 | UP               | -1.37464 | 0.005434 | DOWN              |
| Drp2      | 1.7620168 | 6.18E-07 | UP               | -1.3602  | 0.000305 | DOWN              |
| Bcl6b     | 1.3381298 | 0.002695 | UP               | -1.39862 | 1.89E-10 | DOWN              |
| Pon1      | 1.5291377 | 0.000167 | UP               | -2.93332 | 4.96E-09 | DOWN              |
| Rab3b     | 3.2543477 | 0.000539 | UP               | -3.70665 | 0.000144 | DOWN              |
| Prlr      | 1.2833842 | 0.016403 | UP               | -1.70826 | 0.000926 | DOWN              |
| Dnase1    | 1.404254  | 0.016202 | UP               | -1.49264 | 0.00241  | DOWN              |
| Atp7b     | 1.7918932 | 0.044459 | UP               | -2.00586 | 0.027222 | DOWN              |
| Fzd3      | 1.1364598 | 0.010738 | UP               | -1.33576 | 0.000916 | DOWN              |
| Fhl2      | 1.3266949 | 0.003303 | UP               | -1.62672 | 0.000478 | DOWN              |
| Kif19a    | 1.5022578 | 0.001265 | UP               | -1.14672 | 0.006249 | DOWN              |
| Spire2    | 1.8411472 | 0.029013 | UP               | -1.94725 | 0.002649 | DOWN              |
| Bcas1     | 1.7179001 | 0.002295 | UP               | -1.04182 | 0.015404 | DOWN              |
| Myl2      | 2.2254932 | 0.001311 | UP               | -3.73321 | 7.15E-06 | DOWN              |
| Kif1a     | 1.9159254 | 0.000224 | UP               | -1.66421 | 2.61E-05 | DOWN              |
| Amdhd1    | Inf       | 0.03783  | UP               | #NAME?   | 8.04E-05 | DOWN              |
| Tenm1     | Inf       | 0.03634  | UP               | #NAME?   | 0.012257 | DOWN              |
| Tubb1     | 1.7869047 | 0.0287   | UP               | -1.90536 | 0.01363  | DOWN              |
| Wt1       | Inf       | 0.02235  | UP               | #NAME?   | 0.022529 | DOWN              |
| Pmp22     | 1.2722106 | 0.007779 | UP               | -1.10369 | 0.02437  | DOWN              |
| Ddit4     | 1.3110335 | 2.84E-05 | UP               | -2.66711 | 1.58E-11 | DOWN              |
| Nsg2      | 2.743108  | 0.011766 | UP               | -2.32788 | 0.030427 | DOWN              |
| Cyfip2    | 1.2158008 | 0.019548 | UP               | -1.43267 | 0.001628 | DOWN              |
| Rasgef1c  | 1.4059895 | 0.013403 | UP               | -1.2224  | 0.036363 | DOWN              |
| Adcy1     | 1.6324421 | 0.001863 | UP               | -1.52901 | 0.000695 | DOWN              |
| Mboat2    | 1.2765518 | 0.007568 | UP               | -1.60971 | 0.002295 | DOWN              |
| Doc2b     | 1.4832763 | 0.001963 | UP               | -2.27032 | 7.59E-10 | DOWN              |
| Krt36     | 2.3213612 | 0.020524 | UP               | -2.6894  | 0.001998 | DOWN              |
| Fos       | 1.1269824 | 0.002405 | UP               | -1.07258 | 0.000206 | DOWN              |
| Degs2     | 1.7477845 | 0.044029 | UP               | -1.83473 | 0.037318 | DOWN              |
| Eci3      | 1.7474092 | 0.020357 | UP               | -3.88875 | 4.28E-10 | DOWN              |
| Drd1      | 1.1978423 | 0.03231  | UP               | -1.66244 | 0.014758 | DOWN              |
| Zfp346    | 1.6816061 | 2.63E-07 | UP               | -1.76233 | 2.40E-07 | DOWN              |
| Ocln      | 1.3393853 | 0.014038 | UP               | -1.48714 | 0.020228 | DOWN              |
| Elov17    | 1.4125358 | 0.009919 | UP               | -1.24473 | 0.016851 | DOWN              |
| Hcn1      | 1.3884883 | 0.005171 | UP               | -1.42958 | 0.000444 | DOWN              |
| Dct       | Inf       | 0.004746 | UP               | #NAME?   | 0.000772 | DOWN              |
| Cldn1     | 1.1601187 | 0.010503 | UP               | -1.67361 | 0.000177 | DOWN              |
| Clic6     | 1.7862734 | 0.009674 | UP               | -1.99517 | 0.007697 | DOWN              |
| Cxcl13    | 1.3716518 | 0.003807 | UP               | -2.58623 | 2.98E-05 | DOWN              |
| Lrrc71    | 1.0011775 | 0.048202 | UP               | -1.16508 | 0.023094 | DOWN              |
| Jakmip2   | 3.0474257 | 0.029555 | UP               | -2.62761 | 0.027009 | DOWN              |
| Gnal      | 1.2405875 | 0.012479 | UP               | -1.43949 | 0.002415 | DOWN              |
| Cidea     | 1.8523181 | 0.004372 | UP               | -6.49891 | 3.70E-19 | DOWN              |
| Ankrd1    | 1.9216575 | 0.042013 | UP               | -1.77744 | 0.020225 | DOWN              |
| Ctsw      | Inf       | 0.021247 | UP               | #NAME?   | 7.02E-05 | DOWN              |
| Cdh9      | 2.6744135 | 0.000112 | UP               | -3.17518 | 0.000119 | DOWN              |
| Gli1      | 1.0551415 | 0.012189 | UP               | -1.53426 | 1.61E-05 | DOWN              |
| Cyp2e1    | 1.6748054 | 0.005926 | UP               | -4.30802 | 1.83E-16 | DOWN              |
| Il6       | 1.5105086 | 0.017765 | UP               | -1.52953 | 0.030867 | DOWN              |
| Sntg1     | Inf       | 0.042907 | UP               | #NAME?   | 0.00275  | DOWN              |

|          |           |          |    |          |          |      |
|----------|-----------|----------|----|----------|----------|------|
| Tnni1    | 2.5513184 | 0.000608 | UP | -3.74535 | 2.38E-05 | DOWN |
| Nfasc    | 1.7411411 | 0.000576 | UP | -1.39966 | 0.000303 | DOWN |
| F5       | 1.3480548 | 0.012093 | UP | -2.33839 | 3.04E-08 | DOWN |
| Enkur    | 1.3529996 | 0.015587 | UP | -1.29667 | 0.025201 | DOWN |
| Cubn     | 1.776294  | 0.023347 | UP | -2.18661 | 0.009666 | DOWN |
| Nr4a2    | 1.600286  | 0.003942 | UP | -1.56675 | 1.35E-06 | DOWN |
| Galnt3   | 3.1236456 | 0.010879 | UP | -2.47881 | 0.008086 | DOWN |
| Hdc      | 1.3766361 | 0.004023 | UP | -2.01409 | 2.57E-05 | DOWN |
| Mal      | 2.0917632 | 0.00025  | UP | -1.66489 | 0.000405 | DOWN |
| Car3     | 1.0017694 | 0.002082 | UP | -2.02138 | 2.35E-08 | DOWN |
| Pex5l    | 1.746227  | 0.00208  | UP | -1.34461 | 0.00512  | DOWN |
| Wnt2b    | 1.5278842 | 0.008061 | UP | -1.26686 | 0.007583 | DOWN |
| Hmgcs2   | 1.1427217 | 0.003521 | UP | -1.40982 | 4.75E-05 | DOWN |
| Tpm3     | 1.0251486 | 0.000917 | UP | -1.95099 | 3.35E-06 | DOWN |
| Myoz2    | 1.2017412 | 0.013    | UP | -2.15563 | 0.000115 | DOWN |
| Gabrr1   | 1.0042139 | 0.027277 | UP | -1.12133 | 0.007296 | DOWN |
| Fmn2     | 1.5888366 | 0.01072  | UP | -1.4541  | 0.001734 | DOWN |
| Mfsd2a   | 2.1757297 | 0.000638 | UP | -4.11817 | 4.69E-06 | DOWN |
| Plk3     | 1.4682272 | 0.003694 | UP | -1.83355 | 2.44E-07 | DOWN |
| Stmn1    | 1.4599176 | 0.004151 | UP | -1.55255 | 2.97E-05 | DOWN |
| Slc30a2  | 1.6991836 | 6.07E-06 | UP | -1.68498 | 1.63E-06 | DOWN |
| Fosl2    | 1.0233397 | 4.21E-05 | UP | -1.16247 | 1.85E-08 | DOWN |
| Cgref1   | 1.8584718 | 0.015316 | UP | -1.98391 | 0.002235 | DOWN |
| Spp1     | 2.4650167 | 2.88E-05 | UP | -2.30117 | 1.20E-06 | DOWN |
| Asphd2   | 1.0106031 | 0.025998 | UP | -1.04528 | 0.020154 | DOWN |
| Atp2a2   | 1.111872  | 0.003862 | UP | -2.18998 | 5.53E-06 | DOWN |
| Cd27     | 1.0467932 | 0.020947 | UP | -1.81532 | 4.40E-05 | DOWN |
| Csrp3    | 1.5256331 | 0.001633 | UP | -2.58764 | 0.000202 | DOWN |
| Acsm3    | 1.5849314 | 0.022282 | UP | -4.884   | 2.86E-15 | DOWN |
| Acsm5    | 1.0983429 | 0.044028 | UP | -2.1189  | 1.78E-05 | DOWN |
| Bmx      | 1.2739234 | 0.005274 | UP | -2.10697 | 5.95E-05 | DOWN |
| Tnfsf13b | 1.1422045 | 0.010129 | UP | -1.20579 | 0.016517 | DOWN |
| Gpm6a    | 1.2501289 | 0.006217 | UP | -1.68356 | 0.000313 | DOWN |
| Slit2    | 1.7643144 | 0.004194 | UP | -1.39341 | 0.006878 | DOWN |
| Ucp1     | 2.2881961 | 0.012901 | UP | -8.01324 | 9.08E-11 | DOWN |
| Irx5     | 2.8428799 | 0.009867 | UP | -2.63138 | 0.000432 | DOWN |
| Mt3      | 1.2911768 | 0.005362 | UP | -1.22738 | 0.007211 | DOWN |
| Pllp     | 2.2713895 | 0.000187 | UP | -2.09093 | 4.71E-07 | DOWN |
| Barx2    | 1.4650504 | 0.003007 | UP | -1.45041 | 0.007598 | DOWN |
| Mpz12    | 1.1184088 | 0.000765 | UP | -4.00237 | 8.47E-23 | DOWN |
| Tinag    | 3.9415974 | 0.00321  | UP | -3.42985 | 0.004488 | DOWN |
| Arpp21   | 1.0154819 | 0.007971 | UP | -1.65801 | 7.05E-05 | DOWN |
| Ugt8a    | 2.5773213 | 0.00015  | UP | -1.94324 | 0.00014  | DOWN |
| Sox10    | 1.2774666 | 0.008898 | UP | -1.00199 | 0.004996 | DOWN |
| S100b    | 1.5861953 | 0.000709 | UP | -2.53907 | 0.000151 | DOWN |
| Fa2h     | 1.2992428 | 0.029667 | UP | -1.18303 | 0.034451 | DOWN |
| Egr3     | 1.870639  | 0.008758 | UP | -2.57632 | 1.35E-07 | DOWN |
| Kcnk1    | 1.4772428 | 0.007284 | UP | -1.28157 | 0.004708 | DOWN |
| Pla2g3   | 1.9206611 | 0.011095 | UP | -1.83338 | 0.038519 | DOWN |
| Shc4     | 1.8627443 | 1.36E-08 | UP | -1.31095 | 0.003579 | DOWN |
| Ccr3     | 3.2624139 | 0.009446 | UP | -4.08782 | 0.000509 | DOWN |
| Sostdc1  | 1.9160845 | 0.019805 | UP | -2.52032 | 0.000466 | DOWN |
| Slc18a1  | 1.5628681 | 0.009195 | UP | -2.1745  | 0.000183 | DOWN |
| Mag      | 1.6147615 | 0.013186 | UP | -1.57245 | 0.000186 | DOWN |

|             |           |          |    |          |          |      |
|-------------|-----------|----------|----|----------|----------|------|
| Igflr1      | Inf       | 0.010242 | UP | #NAME?   | 0.018618 | DOWN |
| Myom3       | 1.342974  | 0.002056 | UP | -2.16844 | 1.06E-05 | DOWN |
| Serpine1    | 1.2426234 | 0.00101  | UP | -2.09645 | 5.56E-05 | DOWN |
| Fbxo34      | 1.2032436 | 0.006527 | UP | -1.69026 | 0.000875 | DOWN |
| Acer2       | 1.0537219 | 0.003407 | UP | -2.31605 | 6.54E-08 | DOWN |
| Kcna6       | 1.1506297 | 0.011805 | UP | -1.11915 | 0.01092  | DOWN |
| Egr1        | 1.7580684 | 0.000108 | UP | -1.71121 | 5.02E-05 | DOWN |
| Elov13      | 3.024231  | 0.025756 | UP | -9.01543 | 1.29E-10 | DOWN |
| 3930402G23R | 1.9065843 | 0.015447 | UP | -2.66495 | 0.000183 | DOWN |
| Cfap157     | Inf       | 0.03056  | UP | #NAME?   | 0.039925 | DOWN |
| Ak5         | 1.5752571 | 0.018229 | UP | -1.67744 | 0.00086  | DOWN |
| Nrn1        | 1.5640406 | 0.005661 | UP | -2.02911 | 2.83E-05 | DOWN |
| Svs1        | 4.1769717 | 0.037941 | UP | -5.29519 | 0.003726 | DOWN |
| Zfp750      | 2.6251097 | 0.00087  | UP | -1.91117 | 0.006574 | DOWN |
| Lyplal1     | 1.0767008 | 0.010495 | UP | -2.38031 | 1.13E-08 | DOWN |
| Pak7        | Inf       | 0.013639 | UP | #NAME?   | 0.026294 | DOWN |
| Ptger4      | 1.4424748 | 0.001803 | UP | -1.66732 | 2.05E-07 | DOWN |
| Svs2        | Inf       | 0.001283 | UP | #NAME?   | 4.58E-05 | DOWN |
| Cacng5      | Inf       | 0.02162  | UP | #NAME?   | 0.007833 | DOWN |
| Plekha4     | 1.3066692 | 0.002928 | UP | -1.11677 | 0.00307  | DOWN |
| Spns2       | 1.1123944 | 2.78E-05 | UP | -1.40598 | 2.90E-11 | DOWN |
| Rimkb       | 2.5487696 | 0.002301 | UP | -1.97961 | 0.002963 | DOWN |
| Slco4c1     | Inf       | 0.021681 | UP | #NAME?   | 0.034864 | DOWN |
| Myh6        | 1.3710079 | 0.040009 | UP | -2.33474 | 0.0002   | DOWN |
| Elov16      | 1.1608389 | 0.002816 | UP | -6.25882 | 2.26E-19 | DOWN |
| Tox         | 1.4142921 | 0.001254 | UP | -1.21833 | 0.015176 | DOWN |
| Sdk2        | 1.5878589 | 9.29E-05 | UP | -2.39957 | 1.13E-06 | DOWN |
| Mbp         | 1.3164083 | 0.000193 | UP | -1.53898 | 4.24E-07 | DOWN |
| Gck         | 1.0621549 | 0.008011 | UP | -1.66141 | 4.83E-06 | DOWN |
| Mgat3       | 1.0382849 | 0.007315 | UP | -1.02613 | 0.002141 | DOWN |
| Mustn1      | 1.6613401 | 0.02006  | UP | -1.66164 | 0.002112 | DOWN |
| Ttc9        | 1.3018418 | 0.000413 | UP | -1.80348 | 0.000361 | DOWN |
| Smco3       | 2.3293118 | 0.000198 | UP | -1.71384 | 0.008468 | DOWN |
| Ubxn10      | 2.0526041 | 0.014275 | UP | -2.54672 | 0.001423 | DOWN |
| Ncmap       | 1.5741079 | 0.00278  | UP | -1.49585 | 0.001078 | DOWN |
| P2ry4       | Inf       | 0.008886 | UP | #NAME?   | 0.038265 | DOWN |
| Slc15a5     | 2.2856871 | 0.000414 | UP | -1.58975 | 0.00048  | DOWN |
| Prprt2      | 2.4833767 | 0.005936 | UP | -2.00671 | 0.007392 | DOWN |
| Proser2     | 1.1743558 | 0.00494  | UP | -1.48515 | 0.000552 | DOWN |
| Gldn        | 1.1197049 | 0.011748 | UP | -1.07534 | 0.029748 | DOWN |
| Hepacam     | 2.5785476 | 0.002221 | UP | -2.2947  | 0.00489  | DOWN |
| Fam178b     | 1.9266133 | 0.003232 | UP | -1.595   | 0.003832 | DOWN |
| Kctd4       | Inf       | 0.008516 | UP | #NAME?   | 0.004221 | DOWN |
| Bdh1        | 1.0715635 | 0.039647 | UP | -2.0466  | 0.000483 | DOWN |
| Vat11       | 1.578749  | 0.005636 | UP | -1.8374  | 0.000576 | DOWN |
| Cdh19       | 1.066028  | 0.00294  | UP | -1.44895 | 0.000102 | DOWN |
| Ankfn1      | 2.5111533 | 0.002502 | UP | -1.70924 | 0.005164 | DOWN |
| Pygo2       | 1.4556088 | 0.000167 | UP | -1.28536 | 0.017698 | DOWN |
| Tmem72      | 2.8208095 | 0.011039 | UP | -3.04876 | 0.0042   | DOWN |
| Cfap100     | 2.2296329 | 0.001055 | UP | -1.63319 | 0.017507 | DOWN |
| Frmd3       | 1.9994911 | 0.000542 | UP | -1.66899 | 0.003509 | DOWN |
| Tenm2       | 1.0579895 | 0.010664 | UP | -1.27034 | 0.00505  | DOWN |
| Rasdl       | 1.8553751 | 0.001176 | UP | -3.8766  | 2.12E-15 | DOWN |
| Fhl4        | 1.1217669 | 0.045133 | UP | -1.1723  | 0.034471 | DOWN |

|           |           |          |    |          |          |      |
|-----------|-----------|----------|----|----------|----------|------|
| Vwc2      | Inf       | 0.005033 | UP | #NAME?   | 0.00298  | DOWN |
| Igfn1     | 1.1172996 | 0.007578 | UP | -1.46442 | 0.013074 | DOWN |
| Pmp2      | 4.5278817 | 7.96E-05 | UP | -4.44972 | 7.58E-05 | DOWN |
| Lrrtm4    | Inf       | 0.03421  | UP | #NAME?   | 0.016326 | DOWN |
| Junb      | 1.0966674 | 0.001262 | UP | -1.44993 | 8.26E-07 | DOWN |
| Cyp2f2    | 1.2741672 | 0.032209 | UP | -3.61353 | 3.52E-12 | DOWN |
| Sv2b      | 1.8354298 | 0.000481 | UP | -3.0898  | 1.51E-05 | DOWN |
| Myh7      | 3.1961409 | 0.000961 | UP | -4.66692 | 2.39E-05 | DOWN |
| Ptprt     | 1.2952518 | 0.043469 | UP | -1.80358 | 0.003119 | DOWN |
| Prx       | 1.9030756 | 0.000307 | UP | -1.52763 | 0.000283 | DOWN |
| Adamts18  | 1.3100541 | 0.039405 | UP | -1.50499 | 0.004408 | DOWN |
| Cadm4     | 1.6676487 | 0.002179 | UP | -1.41439 | 0.001238 | DOWN |
| Kcnmb4    | 2.1231609 | 0.042754 | UP | -2.46683 | 0.001887 | DOWN |
| Lmntd1    | 3.5167796 | 0.000955 | UP | -3.00979 | 0.002232 | DOWN |
| Cndpl     | Inf       | 0.008532 | UP | #NAME?   | 0.026412 | DOWN |
| Mpz       | 2.4235933 | 6.54E-05 | UP | -1.92778 | 1.18E-05 | DOWN |
| Gsta2     | 3.9922032 | 0.004633 | UP | -3.96921 | 0.036122 | DOWN |
| Capn11    | 3.4310473 | 9.77E-06 | UP | -4.32608 | 1.21E-08 | DOWN |
| Nap111    | 1.2932503 | 0.000581 | UP | -1.66682 | 2.85E-06 | DOWN |
| Ddn       | 2.2745782 | 0.014198 | UP | -1.79668 | 0.003874 | DOWN |
| Myl3      | 2.3811431 | 0.008413 | UP | -4.11167 | 8.91E-05 | DOWN |
| Rufy4     | 1.762066  | 0.027984 | UP | -3.81182 | 1.39E-08 | DOWN |
| Ces2c     | 2.7003762 | 0.003073 | UP | -3.50224 | 2.11E-06 | DOWN |
| Ifnlr1    | Inf       | 0.042537 | UP | #NAME?   | 0.012485 | DOWN |
| Kcnj15    | 1.1303851 | 0.022233 | UP | -2.05039 | 3.37E-05 | DOWN |
| Sim2      | 1.6755062 | 0.005489 | UP | -1.76258 | 0.000123 | DOWN |
| Msln      | 1.4031233 | 0.00599  | UP | -1.6891  | 0.017633 | DOWN |
| Tnfrsf11b | 1.3813213 | 0.032043 | UP | -1.37629 | 0.038828 | DOWN |
| Tnnt1     | 2.4959276 | 0.000538 | UP | -3.64057 | 5.48E-06 | DOWN |
| Aox3      | 1.0296063 | 0.028206 | UP | -1.42769 | 0.001404 | DOWN |
| Cldn19    | 1.7067056 | 0.002505 | UP | -1.56374 | 0.000289 | DOWN |
| Lgil      | 2.0315908 | 0.001291 | UP | -2.11908 | 2.83E-05 | DOWN |
| Il2rb     | 1.6036858 | 0.020691 | UP | -2.19772 | 2.41E-05 | DOWN |
| Mmp27     | 1.1913815 | 0.04508  | UP | -1.27782 | 0.027736 | DOWN |
| Gpr179    | 3.5693902 | 0.009783 | UP | -3.67922 | 0.015575 | DOWN |
| Ppia      | 1.1192907 | 2.62E-05 | UP | -1.19672 | 0.001831 | DOWN |
| Arhgdig   | 1.5882065 | 0.004403 | UP | -1.51033 | 0.01744  | DOWN |
| Mob3b     | 1.0238104 | 0.003305 | UP | -1.47925 | 2.31E-06 | DOWN |
| Krtdap    | 1.8697773 | 0.009492 | UP | -1.89494 | 0.007156 | DOWN |
| Gm10658   | 1.2921501 | 0.039646 | UP | -1.47978 | 0.044266 | DOWN |
| Gm826     | 1.0109303 | 0.007546 | UP | -1.38869 | 0.005256 | DOWN |
| Ube2n     | 1.3227921 | 0.008027 | UP | -1.50551 | 0.002826 | DOWN |
| AU019990  | 1.576893  | 0.018818 | UP | -1.82796 | 0.004538 | DOWN |
| Gas2l3    | 1.1390464 | 0.006303 | UP | -1.02807 | 0.020453 | DOWN |
| Sptbn5    | 1.2740002 | 0.003898 | UP | -1.10708 | 0.002407 | DOWN |
| Iglc2     | Inf       | 0.012601 | UP | #NAME?   | 0.030258 | DOWN |
| Gm8818    | 3.2555113 | 0.006078 | UP | -3.17352 | 0.002513 | DOWN |
| Cntf      | 1.4527674 | 0.003031 | UP | -1.33808 | 0.014886 | DOWN |
| Stard6    | 1.4523281 | 0.042521 | UP | -1.64199 | 0.022625 | DOWN |
| Gm5847    | Inf       | 0.035947 | UP | #NAME?   | 0.000463 | DOWN |
| Gm12240   | 1.3488969 | 0.022966 | UP | -1.59548 | 0.012511 | DOWN |
| Mir1904   | 1.1113314 | 0.011967 | UP | -1.12175 | 0.00477  | DOWN |
| Gm830     | 1.486829  | 0.005824 | UP | -1.70465 | 0.003748 | DOWN |
| Gm12295   | Inf       | 0.035751 | UP | #NAME?   | 1.76E-05 | DOWN |

|             |           |          |    |          |          |      |
|-------------|-----------|----------|----|----------|----------|------|
| B430219N15R | 1.7470109 | 0.019223 | UP | -2.91797 | 1.55E-05 | DOWN |
| Sbk3        | 1.3573345 | 0.022405 | UP | -2.5462  | 1.72E-05 | DOWN |
| Hotair      | 1.8655187 | 0.04719  | UP | -1.7384  | 0.006007 | DOWN |
| Sap30bpos   | 2.6762014 | 0.024012 | UP | -2.93371 | 0.007987 | DOWN |
| Gm43213     | 1.7315222 | 0.026208 | UP | -2.45654 | 2.86E-06 | DOWN |
| Gm24530     | 1.5160479 | 0.038047 | UP | -1.96389 | 0.020701 | DOWN |
| Usp49       | 1.4051651 | 0.00151  | UP | -1.67627 | 2.02E-05 | DOWN |
| Gm17034     | 1.3596921 | 0.038274 | UP | -1.51507 | 0.033745 | DOWN |
| Gm20425     | Inf       | 0.004626 | UP | #NAME?   | 5.47E-11 | DOWN |
| Apold1      | 1.5839344 | 0.000875 | UP | -1.98231 | 6.16E-16 | DOWN |
| Apoll1b     | 2.1143183 | 0.000579 | UP | -1.76145 | 0.012619 | DOWN |
| Tnnc1       | 2.9425546 | 0.000595 | UP | -4.14904 | 5.24E-06 | DOWN |
| Gm20427     | 1.4269699 | 0.033604 | UP | -2.85579 | 1.58E-05 | DOWN |
| Gm20656     | Inf       | 0.00307  | UP | #NAME?   | 0.00143  | DOWN |
| Igha        | Inf       | 7.45E-05 | UP | #NAME?   | 0.000404 | DOWN |
| Lhx8        | 3.9938547 | 0.007842 | UP | -5.54154 | 1.26E-05 | DOWN |
| Gm26546     | 2.4521787 | 0.019434 | UP | -2.30657 | 0.029807 | DOWN |
| 4930539J05R | 1.2111437 | 0.046218 | UP | -1.73364 | 0.001893 | DOWN |
| Gm26510     | 1.2198864 | 0.020304 | UP | -1.33533 | 0.011652 | DOWN |
| 4732419C18R | 2.8996587 | 0.045999 | UP | -5.49776 | 1.00E-07 | DOWN |
| Gm26751     | 2.584699  | 0.031104 | UP | -2.79783 | 0.018081 | DOWN |
| Mhrt        | 3.9551746 | 0.001717 | UP | -5.23302 | 1.18E-06 | DOWN |
| 9530059014R | 2.5012503 | 0.000178 | UP | -1.68389 | 0.000514 | DOWN |
| Gm6225      | 1.3932157 | 0.04718  | UP | -1.57809 | 0.021859 | DOWN |
| 4933405D12R | Inf       | 0.018623 | UP | #NAME?   | 0.015655 | DOWN |
| Gm26679     | 2.2060704 | 0.029847 | UP | -2.45561 | 0.03242  | DOWN |
| Gm18303     | Inf       | 0.003411 | UP | #NAME?   | 0.007119 | DOWN |
| 1700030C10R | 1.8866227 | 0.008786 | UP | -2.18363 | 0.014636 | DOWN |
| Gm28874     | 1.493199  | 0.012722 | UP | -1.95788 | 0.004319 | DOWN |
| Gm17971     | 1.0824731 | 0.012236 | UP | -1.01911 | 0.001132 | DOWN |
| 1810041H14R | 1.7260643 | 0.001858 | UP | -2.06661 | 0.000937 | DOWN |
| Gm37541     | 1.0850032 | 0.045496 | UP | -1.37185 | 0.011088 | DOWN |
| Gm37783     | 1.0368967 | 0.008105 | UP | -1.33174 | 1.82E-06 | DOWN |
| Gm38036     | 1.1678329 | 0.001111 | UP | -1.46072 | 2.05E-05 | DOWN |
| Gm38357     | 1.1515923 | 1.18E-05 | UP | -1.58082 | 3.13E-07 | DOWN |
| Gm37537     | 1.0136308 | 0.014094 | UP | -1.05529 | 0.004648 | DOWN |
| Gm34302     | Inf       | 0.012449 | UP | #NAME?   | 0.008521 | DOWN |
| 2900035J10R | 1.1942947 | 0.04724  | UP | -1.77521 | 0.004196 | DOWN |
| Gm37510     | 1.0301203 | 0.008302 | UP | -1.19184 | 0.004453 | DOWN |
| Gm43314     | 1.9551895 | 0.006671 | UP | -2.0633  | 0.002978 | DOWN |
| Gm43797     | 1.000953  | 0.003681 | UP | -1.70083 | 6.88E-07 | DOWN |
| Gm42946     | 1.2621475 | 0.012031 | UP | -1.97232 | 0.000143 | DOWN |
| Gm43503     | 1.0775432 | 0.012298 | UP | -1.53561 | 0.000367 | DOWN |
| Gm45234     | 2.1125241 | 0.018578 | UP | -2.28123 | 0.009898 | DOWN |
| Gm44440     | Inf       | 0.001052 | UP | #NAME?   | 0.011902 | DOWN |
| Gm45203     | 1.0756433 | 0.011794 | UP | -1.96155 | 1.39E-06 | DOWN |
| Gm49320     | 7.9556429 | 0.000637 | UP | -9.05838 | 5.85E-08 | DOWN |
| AI314278    | Inf       | 0.003111 | UP | #NAME?   | 8.46E-07 | DOWN |
| Gm36356     | 2.2536317 | 0.038361 | UP | -2.11302 | 0.025706 | DOWN |
| Gm45424     | 1.9148886 | 0.007532 | UP | -2.20112 | 0.007366 | DOWN |
| Gm48114     | 1.6393039 | 0.000508 | UP | -1.42285 | 0.001811 | DOWN |
| Gm49380     | 3.014319  | 2.49E-07 | UP | -1.57209 | 0.043509 | DOWN |
| Gm9129      | Inf       | 0.031055 | UP | #NAME?   | 0.013263 | DOWN |
| Gm47593     | 5.3523367 | 0.000714 | UP | -6.18561 | 1.58E-06 | DOWN |

|             |           |          |      |          |          |      |
|-------------|-----------|----------|------|----------|----------|------|
| Gm40617     | 2.4270927 | 0.019626 | UP   | -3.61837 | 0.000182 | DOWN |
| Gm33111     | Inf       | 0.036025 | UP   | #NAME?   | 0.00686  | DOWN |
| Gm5427      | 3.0500316 | 0.012196 | UP   | -2.85517 | 0.019714 | DOWN |
| Gm18042     | 2.1838293 | 0.020846 | UP   | -1.97768 | 0.043499 | DOWN |
| Gm48302     | 1.2227674 | 0.00137  | UP   | -1.82305 | 3.57E-10 | DOWN |
| Gm48593     | 1.4959145 | 0.000502 | UP   | -1.43475 | 1.84E-07 | DOWN |
| Gm47920     | 1.0220116 | 0.001157 | UP   | -1.40999 | 1.59E-07 | DOWN |
| Gm49311     | 1.452445  | 0.003503 | UP   | -1.52245 | 0.007642 | DOWN |
| Gm46516     | Inf       | 0.031388 | UP   | #NAME?   | 0.0163   | DOWN |
| C230086J09R | 1.3312718 | 0.004005 | UP   | -1.3466  | 0.006132 | DOWN |
| Gm31251     | 2.2946895 | 0.048991 | UP   | -3.67794 | 5.29E-05 | DOWN |
| Gm30970     | 1.0295415 | 0.045753 | UP   | -2.01769 | 0.000141 | DOWN |
| Gm2682      | Inf       | 0.001709 | UP   | #NAME?   | 1.11E-05 | DOWN |
| Elf3        | -1.121181 | 0.026797 | DOWN | 1.339695 | 0.002555 | UP   |
| Pax3        | -1.094223 | 0.02664  | DOWN | 1.163196 | 2.79E-05 | UP   |
| Ccl8        | -2.426228 | 0.003003 | DOWN | 1.470391 | 0.034412 | UP   |
| Pcsk1       | -1.141435 | 0.001394 | DOWN | 1.960889 | 6.87E-07 | UP   |
| Nr4a3       | -1.5554   | 3.47E-05 | DOWN | 1.225581 | 0.000182 | UP   |
| Sh3gl2      | -2.081071 | 5.64E-06 | DOWN | 2.803522 | 1.83E-09 | UP   |
| Ppmln       | -1.058253 | 0.012598 | DOWN | 3.000682 | 2.93E-08 | UP   |
| Dkk3        | -1.518873 | 0.000588 | DOWN | 2.060882 | 1.16E-07 | UP   |
| Zfp92       | -1.553055 | 0.027863 | DOWN | 1.216859 | 0.035556 | UP   |
| Pou2f3      | -2.672267 | 0.010465 | DOWN | 2.046599 | 0.032114 | UP   |
| Cish        | -2.487363 | 1.64E-20 | DOWN | 2.1587   | 1.43E-14 | UP   |
| Vax2        | -3.73425  | 0.002507 | DOWN | 1.550073 | 0.048685 | UP   |
| Ccl12       | -3.965079 | 0.00141  | DOWN | 2.641596 | 0.0058   | UP   |
| Ccl7        | -1.924166 | 0.005174 | DOWN | 1.669165 | 0.006831 | UP   |
| Megf11      | -1.264218 | 0.028085 | DOWN | 1.597213 | 0.002069 | UP   |
| Socs1       | -2.361433 | 1.61E-06 | DOWN | 2.44948  | 4.05E-07 | UP   |
| 4932438H23R | -1.872502 | 0.019401 | DOWN | 1.740581 | 0.019357 | UP   |
| Cd209e      | -1.520768 | 0.033734 | DOWN | 2.146486 | 0.001096 | UP   |
| Map6d1      | -1.726512 | 0.047048 | DOWN | 3.074208 | 0.007729 | UP   |
| Rel12       | -1.42277  | 0.019966 | DOWN | 1.235684 | 0.039337 | UP   |
| Apo17c      | #NAME?    | 0.001161 | DOWN | 3.583676 | 0.005716 | UP   |
| Mmp12       | #NAME?    | 1.16E-05 | DOWN | 4.239946 | 0.000463 | UP   |
| C130026L21R | -2.523226 | 0.024031 | DOWN | 2.31491  | 0.02371  | UP   |
| Socs3       | -1.461851 | 4.61E-05 | DOWN | 1.322875 | 2.70E-05 | UP   |
| Cldn23      | #NAME?    | 0.001691 | DOWN | 2.491168 | 0.028549 | UP   |
| Rpl12l-ps12 | -1.839607 | 0.012602 | DOWN | 2.537707 | 0.000902 | UP   |
| Kcnh7       | -1.111919 | 0.016375 | DOWN | 2.453351 | 3.86E-11 | UP   |
| Clca4a      | -2.146688 | 0.002907 | DOWN | 2.729295 | 0.000758 | UP   |
| Kcng1       | -1.700116 | 0.004115 | DOWN | 1.401149 | 0.003396 | UP   |
| Gm10782     | #NAME?    | 0.01485  | DOWN | Inf      | 0.013917 | UP   |
| Ighg2b      | #NAME?    | 0.008172 | DOWN | Inf      | 0.007726 | UP   |
| Utp14b      | -1.280461 | 1.46E-09 | DOWN | 1.255252 | 3.33E-09 | UP   |
| Gm12856     | #NAME?    | 0.001357 | DOWN | 2.047901 | 0.030731 | UP   |
| B230312C02R | -1.85503  | 2.38E-10 | DOWN | 1.846494 | 1.97E-10 | UP   |
| Gm15478     | -1.167177 | 0.029683 | DOWN | 2.466703 | 1.04E-05 | UP   |
| Vax2os      | -1.527861 | 0.03291  | DOWN | 1.537489 | 0.01731  | UP   |
| Gm16933     | -1.186897 | 0.014228 | DOWN | 1.041971 | 0.020187 | UP   |
| 4930512H18R | -1.208679 | 0.003987 | DOWN | 3.787461 | 3.47E-18 | UP   |
| Gm12199     | -1.032603 | 0.004768 | DOWN | 1.507311 | 9.17E-05 | UP   |
| D430001F17R | #NAME?    | 0.008152 | DOWN | 2.862426 | 0.042373 | UP   |
| Gm15838     | -3.236679 | 9.37E-06 | DOWN | Inf      | 9.43E-10 | UP   |

|          |           |          |      |          |          |    |
|----------|-----------|----------|------|----------|----------|----|
| Gm16534  | -1.020263 | 0.00184  | DOWN | 1.13025  | 0.000428 | UP |
| Gm26876  | -3.113808 | 5.15E-07 | DOWN | 3.811306 | 7.03E-09 | UP |
| Gm26635  | -1.535233 | 0.040218 | DOWN | 1.857674 | 0.020349 | UP |
| Gm5253   | #NAME?    | 0.03077  | DOWN | Inf      | 0.029311 | UP |
| Gm18342  | #NAME?    | 0.043853 | DOWN | Inf      | 0.042123 | UP |
| Gm49347  | -2.793878 | 0.016914 | DOWN | 2.69398  | 0.016677 | UP |
| AY036118 | -2.083637 | 0.022577 | DOWN | 2.26368  | 0.014427 | UP |
| Gm9402   | -2.956266 | 0.046539 | DOWN | 2.633552 | 0.044306 | UP |
| Gm38534  | #NAME?    | 3.73E-05 | DOWN | 1.808615 | 0.012789 | UP |
| Gm49388  | -2.530209 | 0.044372 | DOWN | 6.06138  | 1.92E-10 | UP |
| Gm33543  | -1.305677 | 0.029604 | DOWN | 2.661545 | 2.23E-13 | UP |
| Gm47416  | -2.70776  | 0.041958 | DOWN | Inf      | 0.003844 | UP |
| Gm48719  | -1.435416 | 0.008835 | DOWN | 2.618363 | 1.87E-05 | UP |
| Gm33958  | #NAME?    | 0.017721 | DOWN | Inf      | 0.017255 | UP |
| Gm33489  | -1.522658 | 0.024864 | DOWN | 1.206656 | 0.042682 | UP |
| Gm47603  | -1.361788 | 0.007302 | DOWN | 2.39615  | 2.51E-05 | UP |
| Gm29676  | -3.861329 | 0.002862 | DOWN | 3.283294 | 0.005301 | UP |
