# Supplementary material for: Resveratrol Alleviates Skeletal Muscle Insulin Resistance by Downregulating Long Noncoding RNA
Source: Hindawi journal article supplement (doi:10.1155/2022/2539519), 2022-01-19
Supplement: f1 [file 2539519.f1.zip]

# All\_differentially\_expressed\_lncRNAs\_in\_the\_\_control\_\_HFD\_\_and\_HFD+RSV\_groups

| lncRNA_id          | log2FC   | P-value  | updown (RHvs HD) | log2FC   | P-value  | updown (HD vs ND) |
|--------------------|----------|----------|------------------|----------|----------|-------------------|
| NONMMUT151772.1    | Inf      | 1.46E-15 | UP               | #NAME?   | 6.23E-05 | DOWN              |
| NONMMUT044149.2    | Inf      | 3.38E-14 | UP               | #NAME?   | 2.70E-05 | DOWN              |
| NONMMUT065156.2    | 6.653339 | 2.22E-10 | UP               | -7.17724 | 5.91E-41 | DOWN              |
| NONMMUT062734.2    | Inf      | 2.40E-10 | UP               | #NAME?   | 0.000222 | DOWN              |
| ENSMUST00000144591 | Inf      | 1.21E-09 | UP               | #NAME?   | 8.00E-06 | DOWN              |
| NONMMUT025210.2    | 3.501751 | 1.41E-09 | UP               | -1.86577 | 0.032229 | DOWN              |
| NONMMUT003237.2    | Inf      | 5.24E-08 | UP               | #NAME?   | 0.000933 | DOWN              |
| NONMMUT030788.2    | 3.386966 | 6.32E-08 | UP               | -2.07264 | 0.008364 | DOWN              |
| NONMMUT066321.2    | Inf      | 7.30E-08 | UP               | #NAME?   | 8.58E-05 | DOWN              |
| ENSMUST00000181045 | 4.111429 | 1.20E-07 | UP               | -3.57742 | 2.18E-05 | DOWN              |
| NONMMUT004498.2    | Inf      | 3.46E-07 | UP               | #NAME?   | 4.77E-05 | DOWN              |
| NONMMUT083064.1    | 3.578567 | 9.44E-07 | UP               | -2.18439 | 0.02567  | DOWN              |
| NONMMUT026869.2    | 7.485915 | 1.33E-06 | UP               | -8.33543 | 1.59E-11 | DOWN              |
| NONMMUT032162.2    | 3.252807 | 1.74E-06 | UP               | -2.75678 | 0.000975 | DOWN              |
| NONMMUT004497.2    | 3.18202  | 2.60E-06 | UP               | -3.0065  | 6.12E-06 | DOWN              |
| NONMMUT082610.1    | 3.500026 | 3.04E-06 | UP               | -2.722   | 0.004713 | DOWN              |
| ENSMUST00000134845 | Inf      | 3.64E-06 | UP               | #NAME?   | 0.000545 | DOWN              |
| NONMMUT008421.2    | 5.182219 | 4.44E-06 | UP               | -4.49533 | 0.000753 | DOWN              |
| NONMMUT141013.1    | Inf      | 6.55E-06 | UP               | #NAME?   | 0.013846 | DOWN              |
| NONMMUT042593.2    | Inf      | 6.80E-06 | UP               | #NAME?   | 0.000743 | DOWN              |
| NONMMUT095117.1    | Inf      | 7.08E-06 | UP               | #NAME?   | 5.61E-05 | DOWN              |
| NONMMUT087867.1    | Inf      | 1.18E-05 | UP               | #NAME?   | 0.000137 | DOWN              |
| NONMMUT152957.1    | Inf      | 1.37E-05 | UP               | #NAME?   | 0.002989 | DOWN              |
| NONMMUT082499.1    | Inf      | 1.46E-05 | UP               | #NAME?   | 0.001765 | DOWN              |
| ENSMUST00000182265 | Inf      | 1.48E-05 | UP               | #NAME?   | 7.48E-06 | DOWN              |
| NONMMUT145717.1    | 4.82329  | 1.67E-05 | UP               | -3.42996 | 0.003878 | DOWN              |
| NONMMUT103354.1    | Inf      | 2.27E-05 | UP               | #NAME?   | 3.05E-05 | DOWN              |
| NONMMUT128951.1    | 4.876355 | 2.89E-05 | UP               | -5.84502 | 2.88E-07 | DOWN              |
| NONMMUT145909.1    | 3.575655 | 3.04E-05 | UP               | -4.44549 | 6.50E-05 | DOWN              |
| ENSMUST00000142678 | Inf      | 3.32E-05 | UP               | #NAME?   | 0.028613 | DOWN              |
| ENSMUST00000161890 | 6.206952 | 7.53E-05 | UP               | -5.09606 | 0.013794 | DOWN              |
| NONMMUT071570.2    | 2.040383 | 7.76E-05 | UP               | -2.34278 | 1.52E-05 | DOWN              |
| NONMMUT143802.1    | 2.484837 | 0.000105 | UP               | -2.23912 | 0.000257 | DOWN              |
| NONMMUT024340.2    | 1.727535 | 0.000114 | UP               | -1.99805 | 6.44E-07 | DOWN              |
| ENSMUST00000180835 | Inf      | 0.000119 | UP               | #NAME?   | 0.037227 | DOWN              |
| NONMMUT152140.1    | 3.671173 | 0.000159 | UP               | -3.39081 | 0.005418 | DOWN              |
| NONMMUT041113.2    | Inf      | 0.000166 | UP               | #NAME?   | 0.000485 | DOWN              |
| NONMMUT015425.2    | Inf      | 0.000168 | UP               | #NAME?   | 2.28E-08 | DOWN              |
| MSTRG.8668.1       | 2.418835 | 0.0002   | UP               | -3.65006 | 8.30E-13 | DOWN              |
| NONMMUT051818.2    | 1.757541 | 0.000229 | UP               | -1.49982 | 0.00019  | DOWN              |
| NONMMUT098052.1    | Inf      | 0.000256 | UP               | #NAME?   | 6.31E-05 | DOWN              |
| NONMMUT033805.2    | Inf      | 0.000258 | UP               | #NAME?   | 4.09E-06 | DOWN              |
| NONMMUT117757.1    | 1.946318 | 0.000268 | UP               | -2.22036 | 0.000126 | DOWN              |
| NONMMUT039810.2    | Inf      | 0.000315 | UP               | #NAME?   | 0.024073 | DOWN              |
| ENSMUST00000063376 | Inf      | 0.000337 | UP               | #NAME?   | 0.000182 | DOWN              |
| ENSMUST00000181719 | Inf      | 0.000342 | UP               | #NAME?   | 0.00085  | DOWN              |

|                    |          |          |    |          |          |      |
|--------------------|----------|----------|----|----------|----------|------|
| NONMMUT020965.2    | Inf      | 0.00038  | UP | #NAME?   | 0.024403 | DOWN |
| NONMMUT048831.2    | 1.547263 | 0.000408 | UP | -1.27298 | 0.046708 | DOWN |
| NONMMUT018620.2    | 1.762165 | 0.000445 | UP | -1.42573 | 0.032203 | DOWN |
| NONMMUT145721.1    | 3.144452 | 0.000475 | UP | -2.39581 | 0.00904  | DOWN |
| NONMMUT081465.1    | 2.214893 | 0.000569 | UP | -2.27567 | 0.000759 | DOWN |
| NONMMUT119847.1    | 2.197726 | 0.000589 | UP | -2.871   | 6.07E-06 | DOWN |
| NONMMUT145026.1    | 2.733938 | 0.00075  | UP | -2.22543 | 0.005502 | DOWN |
| NONMMUT144862.1    | 2.825872 | 0.000763 | UP | -3.02175 | 0.000339 | DOWN |
| NONMMUT098269.1    | 2.306565 | 0.000783 | UP | -2.86005 | 2.20E-09 | DOWN |
| ENSMUST00000153523 | Inf      | 0.000829 | UP | #NAME?   | 0.001224 | DOWN |
| NONMMUT148959.1    | 2.39635  | 0.000835 | UP | -1.82185 | 0.022286 | DOWN |
| NONMMUT082612.1    | 2.32774  | 0.000862 | UP | -2.21433 | 0.00079  | DOWN |
| NONMMUT085423.1    | 4.481145 | 0.000912 | UP | -2.59391 | 0.027547 | DOWN |
| NONMMUT014906.2    | 3.495239 | 0.000975 | UP | -3.165   | 0.00141  | DOWN |
| NONMMUT085957.1    | Inf      | 0.001003 | UP | #NAME?   | 0.007888 | DOWN |
| NONMMUT012249.2    | Inf      | 0.001048 | UP | #NAME?   | 0.019647 | DOWN |
| NONMMUT016779.2    | Inf      | 0.001071 | UP | #NAME?   | 0.000103 | DOWN |
| NONMMUT111665.1    | 3.400352 | 0.001093 | UP | -3.00848 | 0.016469 | DOWN |
| NONMMUT058911.2    | Inf      | 0.001127 | UP | #NAME?   | 0.000117 | DOWN |
| ENSMUST00000143062 | Inf      | 0.001229 | UP | #NAME?   | 0.000741 | DOWN |
| NONMMUT002357.2    | 1.272545 | 0.001281 | UP | -1.8853  | 1.10E-05 | DOWN |
| NONMMUT145911.1    | 2.259063 | 0.001416 | UP | -3.00013 | 0.000406 | DOWN |
| NONMMUT005462.2    | 2.188452 | 0.00144  | UP | -3.9247  | 0.00019  | DOWN |
| ENSMUST00000217740 | Inf      | 0.001482 | UP | #NAME?   | 0.03787  | DOWN |
| NONMMUT105664.1    | Inf      | 0.001512 | UP | #NAME?   | 0.000196 | DOWN |
| NONMMUT084772.1    | 2.137965 | 0.001525 | UP | -1.98444 | 0.030975 | DOWN |
| NONMMUT086698.1    | Inf      | 0.001579 | UP | #NAME?   | 0.040762 | DOWN |
| NONMMUT026756.2    | Inf      | 0.001593 | UP | #NAME?   | 3.79E-06 | DOWN |
| ENSMUST00000203139 | Inf      | 0.001634 | UP | #NAME?   | 0.028069 | DOWN |
| NONMMUT106058.1    | Inf      | 0.001682 | UP | #NAME?   | 0.010172 | DOWN |
| ENSMUST00000123107 | Inf      | 0.001698 | UP | #NAME?   | 0.009351 | DOWN |
| NONMMUT038181.2    | 4.125149 | 0.001706 | UP | -3.51717 | 0.022306 | DOWN |
| NONMMUT037357.2    | 1.44906  | 0.001709 | UP | -1.20806 | 0.009489 | DOWN |
| NONMMUT083810.1    | Inf      | 0.001728 | UP | #NAME?   | 0.016559 | DOWN |
| NONMMUT151976.1    | 4.378227 | 0.001742 | UP | -3.14194 | 0.033452 | DOWN |
| NONMMUT105903.1    | Inf      | 0.001743 | UP | #NAME?   | 0.008704 | DOWN |
| NONMMUT029108.2    | 1.641602 | 0.001868 | UP | -1.54454 | 0.000248 | DOWN |
| NONMMUT049631.2    | 2.506348 | 0.002162 | UP | -2.9345  | 7.23E-05 | DOWN |
| NONMMUT144900.1    | Inf      | 0.002369 | UP | #NAME?   | 0.005118 | DOWN |
| ENSMUST00000214407 | 1.637673 | 0.002554 | UP | -1.41971 | 0.011903 | DOWN |
| NONMMUT139410.1    | 2.338117 | 0.002568 | UP | -2.88884 | 5.32E-05 | DOWN |
| NONMMUT071137.2    | 4.175508 | 0.002584 | UP | -4.68653 | 0.000105 | DOWN |
| NONMMUT036416.2    | Inf      | 0.002669 | UP | #NAME?   | 0.014499 | DOWN |
| NONMMUT032182.2    | 3.771952 | 0.00274  | UP | -3.30598 | 0.026817 | DOWN |
| NONMMUT067433.2    | 2.503929 | 0.002851 | UP | -2.56721 | 0.036996 | DOWN |
| NONMMUT127860.1    | 3.826814 | 0.003062 | UP | -4.39494 | 3.11E-05 | DOWN |
| NONMMUT065814.2    | 2.477422 | 0.003249 | UP | -2.56245 | 0.000742 | DOWN |
| ENSMUST00000181107 | 3.403546 | 0.003277 | UP | -2.84038 | 0.01362  | DOWN |
| NONMMUT150177.1    | Inf      | 0.003285 | UP | #NAME?   | 0.001409 | DOWN |
| NONMMUT068574.2    | 2.191468 | 0.003364 | UP | -1.53897 | 0.002069 | DOWN |

|                    |          |          |    |          |          |      |
|--------------------|----------|----------|----|----------|----------|------|
| NONMMUT050471.2    | 1.145762 | 0.00341  | UP | -1.23538 | 0.003924 | DOWN |
| NONMMUT064747.2    | 1.628943 | 0.003478 | UP | -1.65537 | 0.008543 | DOWN |
| NONMMUT051328.2    | 2.5138   | 0.003531 | UP | -3.39097 | 0.003536 | DOWN |
| NONMMUT007491.2    | 3.722279 | 0.003671 | UP | -3.17986 | 0.020863 | DOWN |
| NONMMUT052915.2    | 3.783289 | 0.003684 | UP | -4.27164 | 0.001626 | DOWN |
| NONMMUT095141.1    | 3.430743 | 0.003838 | UP | -3.09183 | 0.004947 | DOWN |
| NONMMUT070299.2    | 1.954348 | 0.003848 | UP | -2.10696 | 0.008798 | DOWN |
| NONMMUT009784.2    | 3.365395 | 0.00385  | UP | -3.07821 | 0.005722 | DOWN |
| NONMMUT032853.2    | 3.056726 | 0.003879 | UP | -3.01215 | 0.003212 | DOWN |
| NONMMUT031472.2    | 2.906945 | 0.003927 | UP | -3.63478 | 0.000214 | DOWN |
| NONMMUT125491.1    | 3.072595 | 0.004025 | UP | -3.35565 | 0.016557 | DOWN |
| NONMMUT005618.2    | Inf      | 0.0041   | UP | #NAME?   | 0.001145 | DOWN |
| NONMMUT121267.1    | 3.819805 | 0.004216 | UP | -4.60964 | 0.003848 | DOWN |
| NONMMUT026984.2    | 3.18429  | 0.004282 | UP | -2.36474 | 0.047615 | DOWN |
| ENSMUST00000195382 | 1.149816 | 0.004313 | UP | -1.57691 | 0.000651 | DOWN |
| ENSMUST00000176925 | Inf      | 0.004451 | UP | #NAME?   | 0.002758 | DOWN |
| NONMMUT006754.2    | 1.58532  | 0.00455  | UP | -1.40809 | 0.018624 | DOWN |
| NONMMUT099013.1    | Inf      | 0.004613 | UP | #NAME?   | 0.010808 | DOWN |
| NONMMUT060728.2    | Inf      | 0.004723 | UP | #NAME?   | 2.23E-05 | DOWN |
| NONMMUT144108.1    | Inf      | 0.005022 | UP | #NAME?   | 0.002791 | DOWN |
| NONMMUT008442.2    | 3.562042 | 0.00503  | UP | -3.16894 | 0.013451 | DOWN |
| NONMMUT040618.2    | 3.00204  | 0.005043 | UP | -3.58832 | 0.004765 | DOWN |
| NONMMUT063320.2    | 1.650368 | 0.005153 | UP | -4.28466 | 1.10E-11 | DOWN |
| NONMMUT120980.1    | 2.43447  | 0.005198 | UP | -3.13403 | 7.56E-05 | DOWN |
| NONMMUT082609.1    | 1.936748 | 0.005276 | UP | -2.2665  | 0.000334 | DOWN |
| ENSMUST00000223248 | 1.494091 | 0.005276 | UP | -1.43136 | 0.000788 | DOWN |
| NONMMUT019266.2    | 1.329356 | 0.005321 | UP | -1.298   | 0.002153 | DOWN |
| NONMMUT089908.1    | 1.654509 | 0.005459 | UP | -2.64871 | 1.23E-05 | DOWN |
| NONMMUT066790.2    | 3.263898 | 0.005509 | UP | -4.39316 | 8.31E-05 | DOWN |
| NONMMUT044168.2    | 3.160743 | 0.005578 | UP | -2.80709 | 0.013399 | DOWN |
| NONMMUT136361.1    | Inf      | 0.005695 | UP | #NAME?   | 0.007206 | DOWN |
| NONMMUT041831.2    | Inf      | 0.005721 | UP | #NAME?   | 0.007859 | DOWN |
| NONMMUT059199.2    | 1.635883 | 0.005727 | UP | -2.03162 | 3.86E-07 | DOWN |
| NONMMUT037666.2    | Inf      | 0.00578  | UP | #NAME?   | 0.005045 | DOWN |
| NONMMUT054434.2    | 2.944334 | 0.00584  | UP | -3.51352 | 0.000753 | DOWN |
| ENSMUST00000227412 | Inf      | 0.005913 | UP | #NAME?   | 0.00017  | DOWN |
| NONMMUT083099.1    | 2.20389  | 0.005925 | UP | -2.50042 | 0.000639 | DOWN |
| NONMMUT113826.1    | 3.712397 | 0.005962 | UP | -3.91795 | 0.004922 | DOWN |
| NONMMUT035289.2    | 1.263255 | 0.005974 | UP | -1.17578 | 0.029488 | DOWN |
| NONMMUT036886.2    | 3.665508 | 0.006111 | UP | -4.65911 | 0.001803 | DOWN |
| NONMMUT028236.2    | 3.529686 | 0.006153 | UP | -5.95697 | 0.000697 | DOWN |
| NONMMUT024511.2    | 1.261437 | 0.006363 | UP | -3.11136 | 3.77E-08 | DOWN |
| NONMMUT093617.1    | 3.191784 | 0.006582 | UP | -3.25771 | 0.004506 | DOWN |
| NONMMUT121744.1    | 2.846654 | 0.006619 | UP | -3.22752 | 0.003622 | DOWN |
| NONMMUT001512.2    | Inf      | 0.006637 | UP | #NAME?   | 0.024908 | DOWN |
| ENSMUST00000211953 | Inf      | 0.006944 | UP | #NAME?   | 6.59E-07 | DOWN |
| NONMMUT045553.2    | 1.350757 | 0.007248 | UP | -1.6184  | 0.001062 | DOWN |
| NONMMUT125902.1    | 3.599458 | 0.007319 | UP | -2.90379 | 0.042117 | DOWN |
| NONMMUT049630.2    | Inf      | 0.007446 | UP | #NAME?   | 0.000575 | DOWN |
| NONMMUT143553.1    | Inf      | 0.007464 | UP | #NAME?   | 2.82E-05 | DOWN |

|                    |          |          |    |          |          |      |
|--------------------|----------|----------|----|----------|----------|------|
| NONMMUT104688.1    | 1.536419 | 0.007572 | UP | -1.69657 | 0.009528 | DOWN |
| NONMMUT045554.2    | 1.30537  | 0.007689 | UP | -1.6113  | 0.000448 | DOWN |
| NONMMUT071122.2    | 2.31767  | 0.007793 | UP | -3.66171 | 1.22E-06 | DOWN |
| NONMMUT070229.2    | 1.520451 | 0.008074 | UP | -1.58982 | 0.040095 | DOWN |
| NONMMUT020952.2    | 3.368    | 0.00847  | UP | -5.00384 | 2.23E-05 | DOWN |
| ENSMUST00000132210 | 2.454641 | 0.008489 | UP | -2.37901 | 0.016161 | DOWN |
| NONMMUT082607.1    | 1.850278 | 0.008573 | UP | -2.10698 | 0.002025 | DOWN |
| NONMMUT123243.1    | 2.326838 | 0.008645 | UP | -2.73882 | 0.001149 | DOWN |
| NONMMUT021320.2    | 2.41093  | 0.008859 | UP | -2.7187  | 6.39E-06 | DOWN |
| NONMMUT114830.1    | Inf      | 0.009072 | UP | #NAME?   | 0.03493  | DOWN |
| NONMMUT000951.2    | 1.233003 | 0.009156 | UP | -1.01439 | 0.026041 | DOWN |
| NONMMUT104683.1    | 2.750878 | 0.00925  | UP | -2.77249 | 0.002813 | DOWN |
| NONMMUT131139.1    | 2.742333 | 0.009284 | UP | -2.29765 | 0.024185 | DOWN |
| NONMMUT104401.1    | 3.050033 | 0.009374 | UP | -4.82636 | 1.48E-09 | DOWN |
| NONMMUT020942.2    | 3.175826 | 0.009767 | UP | -3.42452 | 0.01013  | DOWN |
| ENSMUST00000207720 | 2.800268 | 0.010142 | UP | -3.47921 | 0.000786 | DOWN |
| NONMMUT051843.2    | 2.625953 | 0.010303 | UP | -2.61691 | 0.00859  | DOWN |
| NONMMUT093085.1    | Inf      | 0.010372 | UP | #NAME?   | 0.007888 | DOWN |
| NONMMUT058309.2    | 2.41363  | 0.01042  | UP | -2.23638 | 0.012358 | DOWN |
| ENSMUST00000210575 | 1.914039 | 0.010994 | UP | -2.19845 | 0.01552  | DOWN |
| NONMMUT142459.1    | 1.397107 | 0.011084 | UP | -1.99963 | 0.001101 | DOWN |
| NONMMUT023687.2    | Inf      | 0.011344 | UP | #NAME?   | 7.20E-05 | DOWN |
| ENSMUST00000219324 | Inf      | 0.011512 | UP | #NAME?   | 2.48E-05 | DOWN |
| NONMMUT065570.2    | 1.057041 | 0.011542 | UP | -1.13287 | 0.012178 | DOWN |
| NONMMUT070129.2    | 2.376839 | 0.011613 | UP | -2.39772 | 0.012609 | DOWN |
| NONMMUT006305.2    | 2.078939 | 0.011826 | UP | -2.16109 | 0.006773 | DOWN |
| ENSMUST00000144926 | Inf      | 0.012068 | UP | #NAME?   | 0.037222 | DOWN |
| ENSMUST00000142458 | 1.48483  | 0.012097 | UP | -1.70291 | 0.013001 | DOWN |
| ENSMUST00000196744 | 1.952589 | 0.012109 | UP | -2.05917 | 0.010429 | DOWN |
| NONMMUT145897.1    | 2.94818  | 0.012433 | UP | -3.58455 | 0.001757 | DOWN |
| NONMMUT068680.2    | 1.468927 | 0.012485 | UP | -1.80223 | 0.001112 | DOWN |
| NONMMUT016573.2    | 1.21769  | 0.012689 | UP | -1.41692 | 0.013909 | DOWN |
| NONMMUT024048.2    | 1.584913 | 0.012771 | UP | -1.55727 | 0.035241 | DOWN |
| ENSMUST00000228636 | 1.44874  | 0.012786 | UP | -1.51805 | 0.027671 | DOWN |
| NONMMUT037309.2    | 2.380565 | 0.012854 | UP | -2.95902 | 0.000698 | DOWN |
| NONMMUT145613.1    | Inf      | 0.012929 | UP | #NAME?   | 0.001699 | DOWN |
| NONMMUT097793.1    | 2.224933 | 0.012938 | UP | -1.98644 | 0.049892 | DOWN |
| NONMMUT016330.2    | 1.6396   | 0.01294  | UP | -1.66363 | 0.031616 | DOWN |
| NONMMUT108397.1    | 2.297848 | 0.013143 | UP | -2.42159 | 0.003104 | DOWN |
| NONMMUT021124.2    | Inf      | 0.013584 | UP | #NAME?   | 0.003752 | DOWN |
| ENSMUST00000223261 | Inf      | 0.013586 | UP | #NAME?   | 0.012475 | DOWN |
| NONMMUT121746.1    | 1.847461 | 0.013594 | UP | -2.92069 | 0.001475 | DOWN |
| ENSMUST00000201032 | 2.539905 | 0.013598 | UP | -2.62444 | 0.013587 | DOWN |
| ENSMUST00000227609 | 1.329439 | 0.013936 | UP | -1.34269 | 0.027795 | DOWN |
| NONMMUT027419.2    | 1.356893 | 0.013989 | UP | -1.62786 | 0.006307 | DOWN |
| ENSMUST00000194586 | 1.166962 | 0.013992 | UP | -1.45804 | 0.002241 | DOWN |
| NONMMUT132335.1    | 2.182182 | 0.014126 | UP | -2.89194 | 0.000587 | DOWN |
| ENSMUST00000222965 | 1.221574 | 0.014213 | UP | -1.81991 | 3.03E-05 | DOWN |
| NONMMUT067225.2    | Inf      | 0.014409 | UP | #NAME?   | 0.007457 | DOWN |
| NONMMUT112935.1    | 2.598558 | 0.014675 | UP | -3.12074 | 0.000742 | DOWN |

|                    |          |          |    |          |          |      |
|--------------------|----------|----------|----|----------|----------|------|
| NONMMUT026054.2    | 1.359795 | 0.014903 | UP | -1.62739 | 0.00021  | DOWN |
| ENSMUST00000148972 | 2.186908 | 0.015264 | UP | -3.16589 | 0.000772 | DOWN |
| NONMMUT079507.1    | 2.108623 | 0.015308 | UP | -3.10012 | 0.000344 | DOWN |
| MSTRG.53209.18     | 1.120936 | 0.015337 | UP | -1.20654 | 0.018956 | DOWN |
| NONMMUT062890.2    | 1.157257 | 0.015395 | UP | -3.14328 | 2.35E-08 | DOWN |
| NONMMUT111094.1    | Inf      | 0.015535 | UP | #NAME?   | 0.000318 | DOWN |
| NONMMUT041160.2    | Inf      | 0.015736 | UP | #NAME?   | 0.013811 | DOWN |
| NONMMUT112066.1    | Inf      | 0.015736 | UP | #NAME?   | 0.007888 | DOWN |
| NONMMUT144224.1    | Inf      | 0.015736 | UP | #NAME?   | 0.004035 | DOWN |
| NONMMUT114119.1    | 2.892291 | 0.016488 | UP | -3.06719 | 0.02221  | DOWN |
| NONMMUT101832.1    | 2.197522 | 0.016743 | UP | -2.77239 | 0.001038 | DOWN |
| NONMMUT041595.2    | 3.269557 | 0.016857 | UP | -3.35469 | 0.017942 | DOWN |
| ENSMUST00000217680 | 3.052595 | 0.016861 | UP | -2.85681 | 0.035896 | DOWN |
| NONMMUT104385.1    | Inf      | 0.016904 | UP | #NAME?   | 0.020406 | DOWN |
| NONMMUT090042.1    | Inf      | 0.017147 | UP | #NAME?   | 0.017198 | DOWN |
| NONMMUT028948.2    | 1.414559 | 0.017267 | UP | -1.85332 | 0.010549 | DOWN |
| NONMMUT142849.1    | 1.781112 | 0.01733  | UP | -1.97334 | 0.010924 | DOWN |
| NONMMUT048462.2    | Inf      | 0.017517 | UP | #NAME?   | 0.000934 | DOWN |
| NONMMUT100922.1    | 1.271057 | 0.018234 | UP | -1.51266 | 0.007698 | DOWN |
| NONMMUT148890.1    | 3.205156 | 0.018613 | UP | -3.37594 | 0.037309 | DOWN |
| NONMMUT009222.2    | 1.880118 | 0.018735 | UP | -2.89157 | 5.64E-05 | DOWN |
| ENSMUST00000190917 | 1.491142 | 0.019678 | UP | -1.95412 | 0.016418 | DOWN |
| NONMMUT052905.2    | Inf      | 0.01969  | UP | #NAME?   | 0.047348 | DOWN |
| NONMMUT093070.1    | Inf      | 0.019775 | UP | #NAME?   | 0.007834 | DOWN |
| NONMMUT102759.1    | Inf      | 0.01987  | UP | #NAME?   | 0.033254 | DOWN |
| NONMMUT103293.1    | 3.328263 | 0.019947 | UP | -3.29807 | 0.028639 | DOWN |
| NONMMUT148899.1    | 1.854428 | 0.019961 | UP | -1.82669 | 0.000994 | DOWN |
| NONMMUT120979.1    | 2.207608 | 0.019966 | UP | -3.00306 | 0.000321 | DOWN |
| ENSMUST00000211335 | 1.795249 | 0.020051 | UP | -1.6942  | 0.044377 | DOWN |
| NONMMUT020956.2    | 3.309846 | 0.020601 | UP | -4.81189 | 3.88E-05 | DOWN |
| NONMMUT096189.1    | 1.262365 | 0.020664 | UP | -1.46622 | 0.003825 | DOWN |
| NONMMUT020954.2    | 2.639729 | 0.02073  | UP | -3.88388 | 7.55E-05 | DOWN |
| NONMMUT019488.2    | 1.244737 | 0.021109 | UP | -2.2773  | 2.55E-05 | DOWN |
| NONMMUT089907.1    | 1.397039 | 0.021163 | UP | -2.29617 | 0.000239 | DOWN |
| NONMMUT001616.2    | 2.299814 | 0.021216 | UP | -2.00344 | 0.013281 | DOWN |
| ENSMUST00000181558 | 2.115522 | 0.021269 | UP | -2.50014 | 0.002611 | DOWN |
| NONMMUT036933.2    | 2.150073 | 0.0213   | UP | -1.98392 | 0.043421 | DOWN |
| NONMMUT018610.2    | 1.275341 | 0.021775 | UP | -1.56092 | 0.006534 | DOWN |
| NONMMUT092674.1    | 1.649994 | 0.021812 | UP | -2.01352 | 0.001921 | DOWN |
| ENSMUST00000137752 | Inf      | 0.022053 | UP | #NAME?   | 0.015197 | DOWN |
| NONMMUT068568.2    | Inf      | 0.022132 | UP | #NAME?   | 1.61E-05 | DOWN |
| NONMMUT086230.1    | 1.444709 | 0.022513 | UP | -1.43151 | 0.036259 | DOWN |
| NONMMUT107279.1    | 1.306418 | 0.023388 | UP | -1.56899 | 0.00897  | DOWN |
| NONMMUT000680.2    | 2.143756 | 0.023535 | UP | -2.396   | 0.006349 | DOWN |
| NONMMUT129191.1    | Inf      | 0.023649 | UP | #NAME?   | 0.047208 | DOWN |
| NONMMUT055764.2    | 2.320391 | 0.023805 | UP | -2.68781 | 0.010636 | DOWN |
| ENSMUST00000160126 | 3.089119 | 0.023942 | UP | -4.84242 | 9.73E-08 | DOWN |
| NONMMUT019257.2    | 1.138787 | 0.024022 | UP | -1.28237 | 0.006042 | DOWN |
| NONMMUT004318.2    | 1.118358 | 0.024177 | UP | -1.54841 | 0.016731 | DOWN |
| NONMMUT081472.1    | 3.669301 | 0.024628 | UP | -3.76661 | 0.02199  | DOWN |

|                    |          |          |    |          |          |      |
|--------------------|----------|----------|----|----------|----------|------|
| ENSMUST00000132264 | 2.266873 | 0.024752 | UP | -2.52278 | 0.012791 | DOWN |
| NONMMUT027946.2    | 2.244892 | 0.024848 | UP | -2.55158 | 0.002052 | DOWN |
| NONMMUT104682.1    | 2.09585  | 0.024933 | UP | -2.27375 | 0.01592  | DOWN |
| NONMMUT083995.1    | 1.824743 | 0.025293 | UP | -3.33095 | 0.006818 | DOWN |
| NONMMUT091482.1    | 2.692997 | 0.0255   | UP | -2.92279 | 0.044019 | DOWN |
| NONMMUT046059.2    | 2.479987 | 0.026006 | UP | -2.42446 | 0.033271 | DOWN |
| NONMMUT093071.1    | Inf      | 0.026227 | UP | #NAME?   | 0.049857 | DOWN |
| NONMMUT131176.1    | 2.82718  | 0.026265 | UP | -4.10634 | 6.06E-05 | DOWN |
| NONMMUT132620.1    | 2.437679 | 0.02642  | UP | -2.8615  | 0.021669 | DOWN |
| NONMMUT005779.2    | Inf      | 0.026479 | UP | #NAME?   | 0.006717 | DOWN |
| NONMMUT117756.1    | 1.32476  | 0.0265   | UP | -1.9721  | 0.001235 | DOWN |
| ENSMUST00000194151 | 1.028205 | 0.026848 | UP | -1.18824 | 0.022333 | DOWN |
| NONMMUT053851.2    | Inf      | 0.027378 | UP | #NAME?   | 0.001885 | DOWN |
| NONMMUT142245.1    | 1.799837 | 0.027559 | UP | -1.76264 | 0.008112 | DOWN |
| NONMMUT104690.1    | 1.41436  | 0.027741 | UP | -1.80513 | 0.00522  | DOWN |
| NONMMUT069137.2    | 1.051031 | 0.027877 | UP | -1.1903  | 0.031487 | DOWN |
| NONMMUT067083.2    | 2.30268  | 0.02796  | UP | -5.42088 | 3.93E-05 | DOWN |
| NONMMUT042458.2    | Inf      | 0.027988 | UP | #NAME?   | 0.015702 | DOWN |
| NONMMUT056702.2    | 1.839646 | 0.028058 | UP | -2.61329 | 0.001844 | DOWN |
| NONMMUT124526.1    | Inf      | 0.02817  | UP | #NAME?   | 0.024801 | DOWN |
| NONMMUT049261.2    | 1.38495  | 0.028981 | UP | -1.66311 | 0.027422 | DOWN |
| ENSMUST00000151112 | Inf      | 0.029616 | UP | #NAME?   | 0.000168 | DOWN |
| NONMMUT033808.2    | Inf      | 0.029617 | UP | #NAME?   | 0.000827 | DOWN |
| ENSMUST00000152627 | Inf      | 0.029709 | UP | #NAME?   | 0.0466   | DOWN |
| NONMMUT071374.2    | 2.210356 | 0.030232 | UP | -2.63896 | 0.0145   | DOWN |
| NONMMUT081313.1    | Inf      | 0.030705 | UP | #NAME?   | 0.004117 | DOWN |
| NONMMUT044870.2    | 1.007668 | 0.030911 | UP | -1.59105 | 0.000639 | DOWN |
| NONMMUT093720.1    | Inf      | 0.031024 | UP | #NAME?   | 0.003679 | DOWN |
| NONMMUT132192.1    | 3.246805 | 0.031323 | UP | -3.52515 | 0.036828 | DOWN |
| NONMMUT012041.2    | 1.737659 | 0.031347 | UP | -2.00465 | 0.02383  | DOWN |
| NONMMUT040063.2    | 1.049302 | 0.031985 | UP | -1.60714 | 0.002436 | DOWN |
| ENSMUST00000227739 | Inf      | 0.032041 | UP | #NAME?   | 0.022892 | DOWN |
| NONMMUT124607.1    | Inf      | 0.032045 | UP | #NAME?   | 0.000265 | DOWN |
| NONMMUT043997.2    | 1.985835 | 0.032962 | UP | -3.46379 | 2.67E-10 | DOWN |
| NONMMUT063321.2    | 1.392027 | 0.033136 | UP | -3.82784 | 8.54E-09 | DOWN |
| ENSMUST00000228259 | 2.075865 | 0.033165 | UP | -2.90785 | 0.009192 | DOWN |
| ENSMUST00000196108 | 1.259275 | 0.033281 | UP | -1.96656 | 0.001518 | DOWN |
| ENSMUST00000200033 | 1.075319 | 0.033532 | UP | -1.53137 | 0.004913 | DOWN |
| NONMMUT067703.2    | 1.986325 | 0.034259 | UP | -4.05002 | 0.000195 | DOWN |
| NONMMUT045906.2    | 2.124682 | 0.035026 | UP | -2.55675 | 0.005425 | DOWN |
| NONMMUT006595.2    | 2.722761 | 0.035391 | UP | -4.13016 | 0.000508 | DOWN |
| NONMMUT079501.1    | 1.471694 | 0.035519 | UP | -3.14191 | 1.26E-05 | DOWN |
| NONMMUT113863.1    | 1.179964 | 0.035829 | UP | -1.60869 | 0.006883 | DOWN |
| NONMMUT007296.2    | 2.014255 | 0.035886 | UP | -1.82538 | 0.04872  | DOWN |
| NONMMUT051867.2    | 1.042047 | 0.035917 | UP | -1.58028 | 0.003522 | DOWN |
| NONMMUT027151.2    | 2.173588 | 0.036251 | UP | -2.50727 | 0.038424 | DOWN |
| NONMMUT048676.2    | 1.8182   | 0.036268 | UP | -2.23584 | 0.034269 | DOWN |
| ENSMUST00000228514 | Inf      | 0.036283 | UP | #NAME?   | 7.05E-05 | DOWN |
| NONMMUT049629.2    | 2.256828 | 0.037615 | UP | -2.86248 | 0.007747 | DOWN |
| NONMMUT028049.2    | 4.423993 | 0.038034 | UP | -5.47519 | 0.000103 | DOWN |

|                    |          |          |    |          |          |      |
|--------------------|----------|----------|----|----------|----------|------|
| NONMMUT074302.2    | 1.32386  | 0.038176 | UP | -2.3364  | 0.000519 | DOWN |
| ENSMUST00000181218 | 2.58031  | 0.038236 | UP | -2.79082 | 0.024143 | DOWN |
| NONMMUT098272.1    | 2.568467 | 0.038263 | UP | -2.645   | 0.031711 | DOWN |
| NONMMUT003505.2    | 2.794479 | 0.038341 | UP | -4.24781 | 7.72E-05 | DOWN |
| NONMMUT018368.2    | 1.033446 | 0.03847  | UP | -1.58815 | 0.000253 | DOWN |
| NONMMUT018269.2    | Inf      | 0.038625 | UP | #NAME?   | 0.003706 | DOWN |
| NONMMUT020640.2    | 2.052915 | 0.038643 | UP | -2.17512 | 0.040659 | DOWN |
| NONMMUT032158.2    | 1.810016 | 0.038683 | UP | -2.49792 | 0.002164 | DOWN |
| NONMMUT109465.1    | 3.209766 | 0.039348 | UP | -3.5898  | 0.026269 | DOWN |
| NONMMUT122583.1    | Inf      | 0.039421 | UP | #NAME?   | 0.000266 | DOWN |
| NONMMUT055714.2    | 1.017915 | 0.039856 | UP | -1.07938 | 0.031784 | DOWN |
| NONMMUT033627.2    | 2.051816 | 0.040011 | UP | -3.39293 | 0.000627 | DOWN |
| ENSMUST00000140716 | 1.247507 | 0.040295 | UP | -1.46306 | 0.031221 | DOWN |
| ENSMUST00000192154 | 1.011855 | 0.040541 | UP | -1.05223 | 0.033602 | DOWN |
| ENSMUST00000206384 | 1.073792 | 0.04063  | UP | -1.95959 | 0.000162 | DOWN |
| NONMMUT035346.2    | 1.663925 | 0.040809 | UP | -3.39956 | 0.001576 | DOWN |
| NONMMUT104689.1    | 1.404215 | 0.040926 | UP | -1.74739 | 0.015553 | DOWN |
| NONMMUT091098.1    | Inf      | 0.040996 | UP | #NAME?   | 0.027357 | DOWN |
| NONMMUT151902.1    | 1.261113 | 0.041268 | UP | -1.61687 | 0.03155  | DOWN |
| NONMMUT091662.1    | Inf      | 0.041357 | UP | #NAME?   | 0.014278 | DOWN |
| NONMMUT043068.2    | Inf      | 0.04138  | UP | #NAME?   | 0.001409 | DOWN |
| NONMMUT055718.2    | 1.150125 | 0.041578 | UP | -1.24528 | 0.037935 | DOWN |
| ENSMUST00000126622 | Inf      | 0.041998 | UP | #NAME?   | 0.004343 | DOWN |
| NONMMUT145530.1    | Inf      | 0.042211 | UP | #NAME?   | 0.043647 | DOWN |
| NONMMUT033453.2    | 3.547104 | 0.042324 | UP | -3.99847 | 0.000422 | DOWN |
| NONMMUT106467.1    | 1.190779 | 0.042331 | UP | -1.53898 | 0.024878 | DOWN |
| NONMMUT009255.2    | 1.820977 | 0.042637 | UP | -2.22689 | 0.010467 | DOWN |
| NONMMUT104696.1    | 1.323887 | 0.043169 | UP | -1.67233 | 0.010694 | DOWN |
| ENSMUST00000219954 | Inf      | 0.043171 | UP | #NAME?   | 0.010472 | DOWN |
| NONMMUT082665.1    | 2.580492 | 0.043215 | UP | -2.99797 | 0.003514 | DOWN |
| NONMMUT147625.1    | Inf      | 0.043246 | UP | #NAME?   | 0.004034 | DOWN |
| NONMMUT130037.1    | 1.705262 | 0.043256 | UP | -1.76109 | 0.035188 | DOWN |
| ENSMUST00000192025 | 1.035109 | 0.043304 | UP | -1.32791 | 0.002174 | DOWN |
| NONMMUT043074.2    | Inf      | 0.043387 | UP | #NAME?   | 0.046031 | DOWN |
| NONMMUT114839.1    | Inf      | 0.04374  | UP | #NAME?   | 0.000579 | DOWN |
| NONMMUT058329.2    | 3.11998  | 0.043859 | UP | -3.34589 | 0.022436 | DOWN |
| NONMMUT121745.1    | 1.661402 | 0.044555 | UP | -2.90706 | 0.001595 | DOWN |
| NONMMUT025800.2    | 1.152777 | 0.044875 | UP | -1.56139 | 0.004002 | DOWN |
| NONMMUT040060.2    | 1.015018 | 0.044876 | UP | -1.19797 | 0.047115 | DOWN |
| NONMMUT137557.1    | 1.042899 | 0.045192 | UP | -1.33318 | 0.009757 | DOWN |
| ENSMUST00000224036 | 1.060076 | 0.045599 | UP | -1.22111 | 0.036314 | DOWN |
| NONMMUT000952.2    | 1.168553 | 0.04562  | UP | -1.10758 | 0.016258 | DOWN |
| NONMMUT066463.2    | 1.225205 | 0.045685 | UP | -1.52706 | 0.003906 | DOWN |
| ENSMUST00000157948 | 1.514458 | 0.04587  | UP | -1.9593  | 0.036083 | DOWN |
| NONMMUT080947.1    | 3.545138 | 0.047851 | UP | -3.51511 | 0.025352 | DOWN |
| NONMMUT092900.1    | 1.443286 | 0.048115 | UP | -2.05571 | 0.008372 | DOWN |
| NONMMUT051468.2    | 2.554065 | 0.048154 | UP | -3.56141 | 0.000116 | DOWN |
| NONMMUT002689.2    | 1.256229 | 0.048472 | UP | -2.01203 | 0.004747 | DOWN |
| NONMMUT128858.1    | 1.143397 | 0.048488 | UP | -1.94057 | 0.002016 | DOWN |
| NONMMUT085167.1    | 2.536311 | 0.048499 | UP | -2.68894 | 0.046929 | DOWN |

|                    |           |           |      |           |           |      |
|--------------------|-----------|-----------|------|-----------|-----------|------|
| ENSMUST00000120178 | 1. 345769 | 0. 048655 | UP   | -1. 58888 | 0. 03242  | DOWN |
| NONMMUT077089. 1   | 1. 730232 | 0. 0487   | UP   | -2. 00461 | 0. 020569 | DOWN |
| NONMMUT071806. 2   | 1. 725382 | 0. 049027 | UP   | -2. 44897 | 0. 000908 | DOWN |
| NONMMUT027438. 2   | 2. 776355 | 0. 049101 | UP   | -3. 44562 | 0. 002964 | DOWN |
| NONMMUT104686. 1   | 1. 346655 | 0. 049355 | UP   | -1. 47721 | 0. 028232 | DOWN |
| NONMMUT082603. 1   | 1. 477762 | 0. 04937  | UP   | -1. 85876 | 0. 012445 | DOWN |
| NONMMUT040147. 2   | 1. 211655 | 0. 049533 | UP   | -1. 56577 | 0. 024596 | DOWN |
| NONMMUT082605. 1   | 2. 641581 | 0. 049595 | UP   | -3. 12696 | 0. 015624 | DOWN |
| NONMMUT021269. 2   | 1. 928656 | 0. 049657 | UP   | -2. 79194 | 0. 005248 | DOWN |
| NONMMUT110591. 1   | 3. 076259 | 0. 049663 | UP   | -3. 11296 | 0. 022791 | DOWN |
| NONMMUT020278. 2   | 1. 388825 | 0. 049701 | UP   | -1. 86525 | 0. 003759 | DOWN |
| NONMMUT055598. 2   | 1. 019088 | 0. 049733 | UP   | -1. 52029 | 0. 005043 | DOWN |
| NONMMUT080439. 1   | 3. 042139 | 0. 049876 | UP   | -4. 01655 | 0. 002409 | DOWN |
| NONMMUT018494. 2   | -6. 63171 | 1. 25E-30 | DOWN | 6. 72612  | 2. 72E-30 | UP   |
| NONMMUT071342. 2   | -3. 80688 | 1. 60E-13 | DOWN | 1. 630474 | 0. 012079 | UP   |
| NONMMUT153460. 1   | -4. 43375 | 1. 79E-11 | DOWN | 3. 98791  | 1. 14E-10 | UP   |
| NONMMUT146601. 1   | #NAME?    | 7. 51E-10 | DOWN | Inf       | 7. 93E-10 | UP   |
| NONMMUT006953. 2   | -2. 36716 | 2. 40E-09 | DOWN | 1. 275955 | 0. 000623 | UP   |
| NONMMUT144113. 1   | #NAME?    | 3. 22E-09 | DOWN | Inf       | 3. 20E-09 | UP   |
| NONMMUT070926. 2   | -2. 66561 | 8. 38E-08 | DOWN | 1. 344882 | 0. 026106 | UP   |
| NONMMUT068026. 2   | #NAME?    | 1. 20E-07 | DOWN | 3. 220757 | 0. 001089 | UP   |
| NONMMUT019242. 2   | -1. 86027 | 2. 37E-07 | DOWN | 2. 994019 | 1. 34E-16 | UP   |
| NONMMUT139818. 1   | -2. 93598 | 3. 09E-07 | DOWN | 4. 275103 | 5. 42E-10 | UP   |
| ENSMUST00000145549 | -1. 97828 | 7. 99E-07 | DOWN | 1. 981088 | 3. 80E-07 | UP   |
| NONMMUT001029. 2   | -6. 20954 | 1. 09E-06 | DOWN | 5. 951074 | 1. 73E-06 | UP   |
| NONMMUT047957. 2   | -2. 17202 | 1. 80E-06 | DOWN | 3. 62283  | 5. 31E-12 | UP   |
| NONMMUT056994. 2   | -3. 97586 | 2. 22E-06 | DOWN | 4. 330643 | 1. 11E-07 | UP   |
| NONMMUT041793. 2   | -4. 15666 | 2. 47E-06 | DOWN | 3. 348028 | 0. 000102 | UP   |
| NONMMUT015752. 2   | #NAME?    | 5. 27E-06 | DOWN | Inf       | 4. 75E-06 | UP   |
| NONMMUT006717. 2   | -2. 02194 | 8. 66E-06 | DOWN | 2. 041246 | 1. 41E-06 | UP   |
| NONMMUT044528. 2   | -4. 67614 | 1. 12E-05 | DOWN | 4. 314995 | 2. 45E-05 | UP   |
| NONMMUT028282. 2   | #NAME?    | 1. 19E-05 | DOWN | 3. 738517 | 0. 037323 | UP   |
| MSTRG. 26789. 5    | -2. 35799 | 1. 25E-05 | DOWN | 3. 346146 | 4. 90E-17 | UP   |
| NONMMUT005295. 2   | -1. 41758 | 2. 03E-05 | DOWN | 1. 449639 | 1. 11E-06 | UP   |
| NONMMUT044897. 2   | -1. 43116 | 2. 19E-05 | DOWN | 1. 249501 | 2. 60E-05 | UP   |
| NONMMUT147944. 1   | -7. 65705 | 2. 59E-05 | DOWN | 7. 361654 | 3. 08E-05 | UP   |
| NONMMUT006490. 2   | -4. 25073 | 3. 25E-05 | DOWN | 4. 040499 | 4. 37E-05 | UP   |
| NONMMUT141647. 1   | -3. 7519  | 3. 30E-05 | DOWN | 3. 045933 | 2. 40E-05 | UP   |
| NONMMUT054892. 2   | -1. 99848 | 3. 44E-05 | DOWN | 2. 304363 | 8. 76E-08 | UP   |
| NONMMUT051479. 2   | -3. 05151 | 3. 84E-05 | DOWN | 2. 213055 | 0. 00098  | UP   |
| NONMMUT034722. 2   | -5. 99116 | 5. 98E-05 | DOWN | 5. 925451 | 5. 74E-05 | UP   |
| MSTRG. 7055. 12    | -7. 5669  | 6. 81E-05 | DOWN | Inf       | 1. 75E-06 | UP   |
| NONMMUT042491. 2   | -6. 0331  | 6. 81E-05 | DOWN | 5. 439455 | 0. 000152 | UP   |
| NONMMUT028972. 2   | -5. 33988 | 7. 69E-05 | DOWN | 5. 109498 | 9. 40E-05 | UP   |
| NONMMUT003238. 2   | -5. 56027 | 8. 43E-05 | DOWN | 2. 187198 | 0. 045286 | UP   |
| NONMMUT144881. 1   | #NAME?    | 8. 88E-05 | DOWN | 3. 119747 | 0. 01192  | UP   |
| NONMMUT091545. 1   | #NAME?    | 0. 000101 | DOWN | Inf       | 0. 000101 | UP   |
| NONMMUT056862. 2   | -6. 47057 | 0. 000104 | DOWN | 6. 372533 | 0. 000101 | UP   |
| NONMMUT061044. 2   | -5. 02265 | 0. 000116 | DOWN | 3. 580173 | 0. 000913 | UP   |
| NONMMUT011659. 2   | -5. 39538 | 0. 000122 | DOWN | 5. 319133 | 0. 000118 | UP   |



|                    |          |          |      |          |          |    |
|--------------------|----------|----------|------|----------|----------|----|
| NONMMUT004274.2    | -1.86821 | 0.000128 | DOWN | 2.077963 | 1.51E-05 | UP |
| NONMMUT033251.2    | -2.82455 | 0.000132 | DOWN | 1.433706 | 0.004868 | UP |
| NONMMUT051032.2    | -3.63123 | 0.000134 | DOWN | 2.978402 | 0.00045  | UP |
| NONMMUT056993.2    | -3.80737 | 0.000155 | DOWN | 3.254803 | 0.000543 | UP |
| NONMMUT139779.1    | #NAME?   | 0.000163 | DOWN | Inf      | 0.000161 | UP |
| ENSMUST00000161091 | #NAME?   | 0.00019  | DOWN | Inf      | 0.00019  | UP |
| NONMMUT000506.2    | -2.00412 | 0.0002   | DOWN | 2.02832  | 7.57E-05 | UP |
| NONMMUT006943.2    | -2.69896 | 0.000202 | DOWN | 3.491701 | 7.64E-06 | UP |
| NONMMUT074194.2    | -1.40129 | 0.000222 | DOWN | 1.216793 | 0.001626 | UP |
| NONMMUT142323.1    | #NAME?   | 0.000229 | DOWN | 2.671541 | 0.033854 | UP |
| NONMMUT001113.2    | -5.03622 | 0.000237 | DOWN | 5.062797 | 0.000211 | UP |
| NONMMUT127646.1    | -1.49991 | 0.000247 | DOWN | 1.664479 | 3.18E-05 | UP |
| NONMMUT153461.1    | #NAME?   | 0.000256 | DOWN | 5.284574 | 0.001038 | UP |
| NONMMUT017412.2    | -4.16121 | 0.000271 | DOWN | 4.083163 | 0.000253 | UP |
| NONMMUT109311.1    | #NAME?   | 0.000346 | DOWN | Inf      | 0.000329 | UP |
| NONMMUT140130.1    | #NAME?   | 0.000401 | DOWN | 2.60771  | 0.04963  | UP |
| NONMMUT021492.2    | -1.73628 | 0.000403 | DOWN | 1.33823  | 0.004408 | UP |
| NONMMUT075890.1    | #NAME?   | 0.000414 | DOWN | 1.920766 | 0.03266  | UP |
| NONMMUT023599.2    | -3.77067 | 0.000417 | DOWN | 3.066497 | 0.001738 | UP |
| NONMMUT140771.1    | #NAME?   | 0.000422 | DOWN | Inf      | 0.000411 | UP |
| NONMMUT011499.2    | -3.08549 | 0.00043  | DOWN | 1.938894 | 0.025245 | UP |
| NONMMUT045059.2    | -2.31426 | 0.000455 | DOWN | 1.818992 | 0.002051 | UP |
| NONMMUT064551.2    | -3.77916 | 0.000508 | DOWN | 3.682119 | 0.000469 | UP |
| NONMMUT051900.2    | -4.20605 | 0.000511 | DOWN | 4.223767 | 0.000392 | UP |
| NONMMUT072529.2    | -3.65903 | 0.000519 | DOWN | 3.711007 | 0.000352 | UP |
| NONMMUT026006.2    | -1.27756 | 0.000545 | DOWN | 1.71167  | 1.23E-06 | UP |
| NONMMUT021110.2    | -3.98154 | 0.000555 | DOWN | 4.062078 | 0.000367 | UP |
| NONMMUT009671.2    | -1.85259 | 0.000642 | DOWN | 1.658183 | 0.000962 | UP |
| NONMMUT000762.2    | -3.48238 | 0.000643 | DOWN | 3.294464 | 0.000777 | UP |
| NONMMUT025824.2    | -4.64877 | 0.000698 | DOWN | 4.502524 | 0.000721 | UP |
| NONMMUT037802.2    | -3.55091 | 0.000758 | DOWN | 3.689116 | 0.000427 | UP |
| NONMMUT031873.2    | -1.32875 | 0.000809 | DOWN | 1.000675 | 0.002708 | UP |
| NONMMUT067945.2    | -2.42029 | 0.000831 | DOWN | 2.004896 | 0.003776 | UP |
| NONMMUT115247.1    | -2.24081 | 0.00085  | DOWN | 2.974202 | 3.48E-06 | UP |
| NONMMUT068214.2    | -3.29625 | 0.000857 | DOWN | 3.426508 | 0.000473 | UP |
| NONMMUT041462.2    | -3.14546 | 0.000891 | DOWN | 5.040669 | 3.03E-05 | UP |
| NONMMUT034730.2    | -3.73031 | 0.000895 | DOWN | 3.759188 | 0.000544 | UP |
| NONMMUT005179.2    | -3.16609 | 0.001035 | DOWN | 2.912987 | 0.001585 | UP |
| ENSMUST00000205632 | -2.06403 | 0.001124 | DOWN | 1.819923 | 0.001629 | UP |
| NONMMUT018487.2    | -3.45077 | 0.001125 | DOWN | 3.400361 | 0.0011   | UP |
| NONMMUT146291.1    | #NAME?   | 0.001198 | DOWN | Inf      | 0.001118 | UP |
| NONMMUT068190.2    | -2.18228 | 0.001209 | DOWN | 1.211794 | 0.031069 | UP |
| NONMMUT018276.2    | #NAME?   | 0.001213 | DOWN | Inf      | 0.001161 | UP |
| NONMMUT152443.1    | -3.13908 | 0.001265 | DOWN | 2.415444 | 0.00262  | UP |
| NONMMUT006942.2    | -1.07123 | 0.001282 | DOWN | 1.368786 | 5.38E-06 | UP |
| NONMMUT088282.1    | -2.52215 | 0.001382 | DOWN | 3.280079 | 0.000103 | UP |
| NONMMUT063916.2    | -4.04223 | 0.00158  | DOWN | 3.70671  | 0.002252 | UP |
| NONMMUT074195.2    | -1.21041 | 0.001734 | DOWN | 1.252913 | 0.001806 | UP |
| NONMMUT114120.1    | -1.70389 | 0.001773 | DOWN | 1.469136 | 0.005179 | UP |
| NONMMUT018145.2    | -1.25142 | 0.00185  | DOWN | 1.080689 | 0.001379 | UP |

|                    |          |          |      |          |          |    |
|--------------------|----------|----------|------|----------|----------|----|
| NONMMUT038154.2    | -1.14292 | 0.001863 | DOWN | 1.545779 | 1.35E-05 | UP |
| NONMMUT030429.2    | #NAME?   | 0.002048 | DOWN | Inf      | 0.001754 | UP |
| NONMMUT072370.2    | #NAME?   | 0.0021   | DOWN | Inf      | 0.002011 | UP |
| NONMMUT004229.2    | -4.24796 | 0.002149 | DOWN | 2.973688 | 0.009163 | UP |
| NONMMUT150791.1    | -4.8424  | 0.002321 | DOWN | Inf      | 0.000159 | UP |
| NONMMUT019241.2    | -1.24145 | 0.002356 | DOWN | 2.736213 | 4.78E-12 | UP |
| ENSMUST00000098867 | -2.32897 | 0.002486 | DOWN | 1.8774   | 0.005676 | UP |
| NONMMUT037200.2    | -2.79841 | 0.00249  | DOWN | 2.875865 | 0.001592 | UP |
| NONMMUT085019.1    | -3.12101 | 0.002532 | DOWN | 2.101283 | 0.012061 | UP |
| NONMMUT022456.2    | #NAME?   | 0.002779 | DOWN | Inf      | 0.002725 | UP |
| NONMMUT009926.2    | -1.14466 | 0.002811 | DOWN | 1.089468 | 0.001135 | UP |
| NONMMUT075885.1    | -2.60242 | 0.002871 | DOWN | 3.365076 | 0.000448 | UP |
| ENSMUST00000130744 | #NAME?   | 0.002964 | DOWN | Inf      | 0.003021 | UP |
| ENSMUST00000128094 | -1.68169 | 0.003025 | DOWN | 1.709211 | 0.005461 | UP |
| NONMMUT064818.2    | -5.57111 | 0.003128 | DOWN | Inf      | 0.000909 | UP |
| NONMMUT104801.1    | #NAME?   | 0.003225 | DOWN | Inf      | 0.003141 | UP |
| ENSMUST00000222396 | -4.72369 | 0.00338  | DOWN | 3.739426 | 0.007829 | UP |
| NONMMUT058032.2    | -1.13702 | 0.003661 | DOWN | 1.606575 | 0.000116 | UP |
| NONMMUT105841.1    | #NAME?   | 0.003665 | DOWN | Inf      | 0.003651 | UP |
| MSTRG.15728.1      | -1.39301 | 0.003684 | DOWN | 2.761881 | 2.46E-08 | UP |
| NONMMUT013066.2    | -1.99167 | 0.003724 | DOWN | 1.111856 | 0.015469 | UP |
| ENSMUST00000135366 | -3.89432 | 0.00382  | DOWN | 2.869338 | 0.014005 | UP |
| NONMMUT141897.1    | #NAME?   | 0.003922 | DOWN | 2.419484 | 0.044289 | UP |
| NONMMUT051975.2    | -2.71744 | 0.003932 | DOWN | 2.362953 | 0.00702  | UP |
| NONMMUT034442.2    | -1.55463 | 0.003941 | DOWN | 1.228505 | 0.009137 | UP |
| ENSMUST00000202307 | #NAME?   | 0.003947 | DOWN | 3.18627  | 0.033887 | UP |
| ENSMUST00000181291 | #NAME?   | 0.003948 | DOWN | 3.434683 | 0.031123 | UP |
| NONMMUT098746.1    | #NAME?   | 0.003954 | DOWN | Inf      | 0.003955 | UP |
| NONMMUT047958.2    | -1.57592 | 0.003955 | DOWN | 2.377177 | 5.34E-05 | UP |
| NONMMUT010630.2    | -3.58138 | 0.003982 | DOWN | 3.483338 | 0.003813 | UP |
| NONMMUT063720.2    | #NAME?   | 0.004199 | DOWN | Inf      | 0.004296 | UP |
| NONMMUT017414.2    | -3.5391  | 0.004437 | DOWN | 3.408242 | 0.004885 | UP |
| ENSMUST00000212899 | -1.17873 | 0.0045   | DOWN | 1.017475 | 0.009512 | UP |
| NONMMUT115240.1    | -1.7301  | 0.005036 | DOWN | 3.025472 | 8.23E-06 | UP |
| NONMMUT145102.1    | -4.95929 | 0.005152 | DOWN | 5.352016 | 0.004538 | UP |
| NONMMUT004166.2    | -1.13714 | 0.005154 | DOWN | 1.305941 | 1.84E-05 | UP |
| NONMMUT115224.1    | -2.2353  | 0.005177 | DOWN | 3.549763 | 0.000298 | UP |
| NONMMUT034171.2    | -2.64504 | 0.005187 | DOWN | 2.713172 | 0.003505 | UP |
| NONMMUT141643.1    | #NAME?   | 0.005291 | DOWN | Inf      | 0.005363 | UP |
| NONMMUT115232.1    | -2.48758 | 0.005429 | DOWN | 4.169767 | 8.52E-05 | UP |
| NONMMUT032686.2    | -2.35022 | 0.005582 | DOWN | 3.025167 | 0.00084  | UP |
| NONMMUT010546.2    | -2.09747 | 0.005796 | DOWN | 1.170747 | 0.049494 | UP |
| NONMMUT032822.2    | #NAME?   | 0.005804 | DOWN | Inf      | 0.005432 | UP |
| ENSMUST00000212427 | -2.47797 | 0.005898 | DOWN | 3.034692 | 0.001004 | UP |
| NONMMUT021423.2    | -2.70485 | 0.006005 | DOWN | 2.581883 | 0.006565 | UP |
| NONMMUT006364.2    | -2.86982 | 0.006089 | DOWN | 2.355512 | 0.012342 | UP |
| NONMMUT144296.1    | -1.18101 | 0.006191 | DOWN | 2.202638 | 1.14E-07 | UP |
| NONMMUT068192.2    | -2.24585 | 0.006398 | DOWN | 1.531044 | 0.028492 | UP |
| NONMMUT026957.2    | -2.26488 | 0.006793 | DOWN | 2.381647 | 0.003016 | UP |
| NONMMUT144896.1    | #NAME?   | 0.007183 | DOWN | Inf      | 0.00712  | UP |

|                    |          |          |      |          |          |    |
|--------------------|----------|----------|------|----------|----------|----|
| NONMMUT140755.1    | #NAME?   | 0.00721  | DOWN | 3.016593 | 0.034201 | UP |
| ENSMUST00000223171 | -2.46538 | 0.007351 | DOWN | Inf      | 3.63E-05 | UP |
| NONMMUT115259.1    | -2.49484 | 0.007496 | DOWN | 2.211146 | 0.027957 | UP |
| NONMMUT003170.2    | -2.48124 | 0.007499 | DOWN | 2.506239 | 0.001757 | UP |
| NONMMUT115254.1    | -3.23617 | 0.007762 | DOWN | 2.96316  | 0.009588 | UP |
| NONMMUT084736.1    | -3.52452 | 0.007819 | DOWN | 2.509293 | 0.024593 | UP |
| NONMMUT004062.2    | -2.26037 | 0.007863 | DOWN | 2.313781 | 0.004392 | UP |
| NONMMUT091547.1    | -1.90232 | 0.007881 | DOWN | 2.575591 | 0.000423 | UP |
| NONMMUT104643.1    | -2.72659 | 0.008072 | DOWN | 2.70166  | 0.007992 | UP |
| NONMMUT061039.2    | #NAME?   | 0.008154 | DOWN | Inf      | 0.007949 | UP |
| ENSMUST00000181114 | #NAME?   | 0.008637 | DOWN | Inf      | 0.008925 | UP |
| NONMMUT115218.1    | -1.6025  | 0.008691 | DOWN | 3.606837 | 2.07E-08 | UP |
| NONMMUT115198.1    | -1.23036 | 0.008831 | DOWN | 4.580441 | 8.73E-10 | UP |
| NONMMUT078523.1    | #NAME?   | 0.009029 | DOWN | 2.590141 | 0.045194 | UP |
| NONMMUT153718.1    | #NAME?   | 0.009039 | DOWN | Inf      | 0.008343 | UP |
| NONMMUT006395.2    | -1.53218 | 0.009193 | DOWN | 1.212361 | 0.016804 | UP |
| ENSMUST00000137567 | -1.03429 | 0.009374 | DOWN | 1.509992 | 0.000381 | UP |
| NONMMUT024866.2    | #NAME?   | 0.009454 | DOWN | Inf      | 0.009698 | UP |
| MSTRG.7168.3       | #NAME?   | 0.009907 | DOWN | Inf      | 0.009666 | UP |
| NONMMUT041242.2    | #NAME?   | 0.010112 | DOWN | Inf      | 0.009683 | UP |
| NONMMUT144674.1    | -3.76685 | 0.010121 | DOWN | Inf      | 0.002221 | UP |
| NONMMUT071995.2    | -1.60754 | 0.010442 | DOWN | 1.0675   | 0.041612 | UP |
| NONMMUT035148.2    | -2.07747 | 0.010453 | DOWN | 1.784039 | 0.01356  | UP |
| NONMMUT147206.1    | #NAME?   | 0.010767 | DOWN | Inf      | 0.010846 | UP |
| NONMMUT079620.1    | #NAME?   | 0.01091  | DOWN | 2.73129  | 0.047196 | UP |
| NONMMUT115251.1    | -1.66413 | 0.011248 | DOWN | 4.037978 | 9.61E-06 | UP |
| ENSMUST00000214762 | -1.43569 | 0.011666 | DOWN | 2.62091  | 5.97E-05 | UP |
| NONMMUT031976.2    | -2.96119 | 0.011808 | DOWN | Inf      | 3.85E-05 | UP |
| NONMMUT046460.2    | -2.93767 | 0.011913 | DOWN | 3.921203 | 0.003159 | UP |
| ENSMUST00000221520 | -1.36377 | 0.012063 | DOWN | 2.399688 | 7.33E-05 | UP |
| NONMMUT045383.2    | -2.07803 | 0.012187 | DOWN | 1.799528 | 0.016028 | UP |
| NONMMUT045262.2    | -2.63042 | 0.012372 | DOWN | 2.521648 | 0.012907 | UP |
| ENSMUST00000156240 | -2.12032 | 0.012849 | DOWN | Inf      | 7.03E-05 | UP |
| NONMMUT057635.2    | #NAME?   | 0.012904 | DOWN | Inf      | 0.012962 | UP |
| NONMMUT109604.1    | -1.41453 | 0.013123 | DOWN | 2.107397 | 0.001584 | UP |
| NONMMUT147892.1    | #NAME?   | 0.013291 | DOWN | Inf      | 0.013112 | UP |
| NONMMUT100573.1    | -3.37522 | 0.013306 | DOWN | 2.350237 | 0.045762 | UP |
| NONMMUT107951.1    | -1.01877 | 0.013391 | DOWN | 1.369976 | 0.000296 | UP |
| NONMMUT037646.2    | -2.07103 | 0.013464 | DOWN | 1.987113 | 0.013712 | UP |
| NONMMUT038697.2    | -1.49045 | 0.014137 | DOWN | 1.121044 | 0.023481 | UP |
| NONMMUT115257.1    | -1.67765 | 0.014243 | DOWN | 2.67089  | 0.000625 | UP |
| NONMMUT022600.2    | -1.25004 | 0.014354 | DOWN | 2.072973 | 1.04E-06 | UP |
| NONMMUT115228.1    | -1.43165 | 0.014447 | DOWN | 1.902608 | 0.001059 | UP |
| NONMMUT037574.2    | -1.41316 | 0.014813 | DOWN | 2.168444 | 0.000203 | UP |
| NONMMUT124088.1    | -1.42148 | 0.014843 | DOWN | 1.944136 | 0.000376 | UP |
| NONMMUT057396.2    | -1.89213 | 0.015096 | DOWN | 1.904552 | 0.00952  | UP |
| ENSMUST00000133752 | -1.46396 | 0.015098 | DOWN | 5.176146 | 1.65E-16 | UP |
| NONMMUT096936.1    | -3.56043 | 0.015133 | DOWN | 2.480165 | 0.040283 | UP |
| ENSMUST00000141741 | -1.18887 | 0.01529  | DOWN | 1.045485 | 0.017604 | UP |
| MSTRG.59570.45     | -5.72125 | 0.015675 | DOWN | Inf      | 0.000128 | UP |

|                    |          |          |      |          |          |    |
|--------------------|----------|----------|------|----------|----------|----|
| NONMMUT097275.1    | -1.13625 | 0.015862 | DOWN | 1.514779 | 9.02E-05 | UP |
| NONMMUT152961.1    | -2.51886 | 0.015924 | DOWN | 2.213307 | 0.020143 | UP |
| NONMMUT122272.1    | #NAME?   | 0.015946 | DOWN | Inf      | 0.015738 | UP |
| NONMMUT117747.1    | -1.50106 | 0.016157 | DOWN | 3.582312 | 1.91E-05 | UP |
| NONMMUT053180.2    | -1.40608 | 0.016305 | DOWN | 1.149974 | 0.021075 | UP |
| ENSMUST00000148776 | -2.7907  | 0.017089 | DOWN | 2.650018 | 0.021561 | UP |
| NONMMUT027011.2    | -1.15482 | 0.017101 | DOWN | 1.108921 | 0.034708 | UP |
| NONMMUT019952.2    | -1.10683 | 0.018104 | DOWN | 1.707268 | 5.94E-05 | UP |
| NONMMUT092128.1    | #NAME?   | 0.018265 | DOWN | Inf      | 0.017434 | UP |
| NONMMUT053809.2    | -1.31157 | 0.018482 | DOWN | 1.949057 | 0.00464  | UP |
| NONMMUT069789.2    | -1.82379 | 0.018486 | DOWN | 2.725464 | 0.015079 | UP |
| ENSMUST00000223775 | #NAME?   | 0.019363 | DOWN | Inf      | 0.019266 | UP |
| NONMMUT024486.2    | -2.45709 | 0.020067 | DOWN | 2.670171 | 0.010272 | UP |
| ENSMUST00000222879 | #NAME?   | 0.020107 | DOWN | Inf      | 0.019076 | UP |
| NONMMUT139602.1    | #NAME?   | 0.020112 | DOWN | Inf      | 0.01908  | UP |
| NONMMUT088281.1    | -1.48738 | 0.021063 | DOWN | 1.931729 | 0.002624 | UP |
| ENSMUST00000200021 | -2.08909 | 0.021772 | DOWN | 2.270351 | 0.015145 | UP |
| NONMMUT071896.2    | -1.63086 | 0.021936 | DOWN | 1.249926 | 0.041472 | UP |
| NONMMUT033133.2    | -1.16109 | 0.021966 | DOWN | 1.175563 | 0.025135 | UP |
| NONMMUT025156.2    | #NAME?   | 0.022443 | DOWN | Inf      | 0.019017 | UP |
| NONMMUT072803.2    | -1.64588 | 0.022589 | DOWN | 3.376565 | 0.000105 | UP |
| NONMMUT141001.1    | #NAME?   | 0.023454 | DOWN | Inf      | 0.023249 | UP |
| NONMMUT108217.1    | -1.59622 | 0.023566 | DOWN | 1.44856  | 0.021622 | UP |
| MSTRG.4370.7       | -4.6776  | 0.024086 | DOWN | Inf      | 0.00795  | UP |
| NONMMUT115209.1    | -1.20073 | 0.024149 | DOWN | Inf      | 5.56E-09 | UP |
| NONMMUT058611.2    | -1.22303 | 0.024169 | DOWN | 1.702397 | 0.001572 | UP |
| NONMMUT115213.1    | -1.01269 | 0.024829 | DOWN | 2.476503 | 2.06E-06 | UP |
| NONMMUT051122.2    | -1.54937 | 0.02496  | DOWN | 1.980156 | 0.00587  | UP |
| NONMMUT070891.2    | -1.0658  | 0.025157 | DOWN | 2.396573 | 1.29E-05 | UP |
| NONMMUT026732.2    | -1.76175 | 0.025196 | DOWN | 1.754716 | 0.018827 | UP |
| NONMMUT080105.1    | #NAME?   | 0.025834 | DOWN | Inf      | 0.025031 | UP |
| NONMMUT072383.2    | #NAME?   | 0.025837 | DOWN | Inf      | 0.025034 | UP |
| ENSMUST00000148740 | #NAME?   | 0.025838 | DOWN | Inf      | 0.025036 | UP |
| NONMMUT115226.1    | -1.84304 | 0.02653  | DOWN | 1.476965 | 0.026453 | UP |
| NONMMUT115225.1    | -1.47418 | 0.026904 | DOWN | 2.363205 | 0.003433 | UP |
| NONMMUT122614.1    | -2.69109 | 0.027082 | DOWN | 1.967455 | 0.040933 | UP |
| NONMMUT086017.1    | -2.08968 | 0.0276   | DOWN | 2.847495 | 0.002474 | UP |
| NONMMUT012225.2    | -2.11837 | 0.027925 | DOWN | 2.041286 | 0.021686 | UP |
| NONMMUT091178.1    | #NAME?   | 0.028107 | DOWN | Inf      | 0.022509 | UP |
| NONMMUT013067.2    | -1.6     | 0.028404 | DOWN | 1.138685 | 0.030262 | UP |
| NONMMUT001628.2    | -1.27144 | 0.028758 | DOWN | 1.446204 | 0.008075 | UP |
| NONMMUT115260.1    | -1.76944 | 0.029052 | DOWN | 1.55933  | 0.01743  | UP |
| NONMMUT009151.2    | -3.23479 | 0.029263 | DOWN | Inf      | 0.000869 | UP |
| NONMMUT115243.1    | -1.43297 | 0.029386 | DOWN | 2.48319  | 0.000816 | UP |
| NONMMUT133924.1    | -3.06412 | 0.030135 | DOWN | Inf      | 0.005792 | UP |
| NONMMUT022944.2    | -2.37062 | 0.030591 | DOWN | 2.866859 | 0.011084 | UP |
| NONMMUT101552.1    | #NAME?   | 0.031775 | DOWN | Inf      | 0.031412 | UP |
| NONMMUT091458.1    | -1.86385 | 0.033648 | DOWN | 2.050796 | 0.014275 | UP |
| NONMMUT151928.1    | -1.00599 | 0.034844 | DOWN | 1.857114 | 0.001829 | UP |
| NONMMUT115265.1    | -2.72498 | 0.035522 | DOWN | Inf      | 0.002431 | UP |

|                    |          |          |      |          |          |    |
|--------------------|----------|----------|------|----------|----------|----|
| NONMMUT030183.2    | #NAME?   | 0.035557 | DOWN | Inf      | 0.034423 | UP |
| NONMMUT050997.2    | #NAME?   | 0.035557 | DOWN | Inf      | 0.034429 | UP |
| NONMMUT145722.1    | -1.3091  | 0.035961 | DOWN | 1.422464 | 0.001891 | UP |
| ENSMUST00000139288 | -2.31306 | 0.036132 | DOWN | Inf      | 0.001452 | UP |
| NONMMUT151738.1    | -1.19464 | 0.036304 | DOWN | 1.292011 | 0.013875 | UP |
| NONMMUT140348.1    | #NAME?   | 0.036884 | DOWN | Inf      | 0.034806 | UP |
| NONMMUT139186.1    | -3.41217 | 0.037095 | DOWN | Inf      | 0.00063  | UP |
| NONMMUT114934.1    | -1.12399 | 0.038027 | DOWN | 1.994975 | 0.000116 | UP |
| NONMMUT113266.1    | -2.0502  | 0.039618 | DOWN | 2.373116 | 0.018741 | UP |
| ENSMUST00000132822 | #NAME?   | 0.039875 | DOWN | Inf      | 0.037187 | UP |
| ENSMUST00000127284 | -1.12785 | 0.041152 | DOWN | 1.625346 | 0.000105 | UP |
| NONMMUT043749.2    | #NAME?   | 0.041169 | DOWN | Inf      | 0.041351 | UP |
| NONMMUT013388.2    | -2.88632 | 0.041706 | DOWN | 4.198178 | 0.005498 | UP |
| NONMMUT013809.2    | #NAME?   | 0.041885 | DOWN | Inf      | 0.040987 | UP |
| ENSMUST00000217446 | -2.71213 | 0.042129 | DOWN | Inf      | 0.004796 | UP |
| NONMMUT106068.1    | -1.82906 | 0.042269 | DOWN | 1.1998   | 0.017972 | UP |
| NONMMUT076502.1    | #NAME?   | 0.042487 | DOWN | Inf      | 0.040355 | UP |
| NONMMUT030215.2    | #NAME?   | 0.042545 | DOWN | Inf      | 0.041568 | UP |
| NONMMUT153473.1    | #NAME?   | 0.042607 | DOWN | Inf      | 0.04032  | UP |
| NONMMUT124745.1    | -1.80603 | 0.042708 | DOWN | 1.788541 | 0.043498 | UP |
| NONMMUT102916.1    | -1.04486 | 0.043111 | DOWN | 1.022839 | 0.042276 | UP |
| NONMMUT069496.2    | -1.84807 | 0.043293 | DOWN | 4.834189 | 3.69E-24 | UP |
| NONMMUT027240.2    | #NAME?   | 0.04447  | DOWN | Inf      | 0.044343 | UP |
| NONMMUT083152.1    | #NAME?   | 0.044501 | DOWN | Inf      | 0.044315 | UP |
| ENSMUST00000181077 | -1.53888 | 0.04698  | DOWN | 1.860749 | 0.019802 | UP |
| ENSMUST00000180830 | -1.47821 | 0.047871 | DOWN | 1.811377 | 0.002511 | UP |
| NONMMUT073684.2    | -1.44185 | 0.048323 | DOWN | 3.80353  | 0.0002   | UP |
| NONMMUT129985.1    | #NAME?   | 0.048829 | DOWN | Inf      | 0.048369 | UP |
| ENSMUST00000152575 | -1.26917 | 0.04905  | DOWN | 1.568925 | 0.013839 | UP |
| NONMMUT046124.2    | -1.99169 | 0.049254 | DOWN | 2.668716 | 0.011762 | UP |
| NONMMUT093335.1    | -1.01537 | 0.049281 | DOWN | 1.609595 | 0.001844 | UP |
| NONMMUT074146.2    | -1.93989 | 0.049314 | DOWN | 2.071069 | 0.037101 | UP |
| ENSMUST00000188137 | -1.20997 | 0.049968 | DOWN | 1.025745 | 0.048669 | UP |
