# Supplementary material for: Resveratrol Alleviates Skeletal Muscle Insulin Resistance by Downregulating Long Noncoding RNA
Source: Int J Endocrinol. 2022 Jan 19;2022:2539519. doi: 10.1155/2022/2539519 (PMC8791716; doi:10.1155/2022/2539519)
Supplement: Supplementary Materials — All differentially expressed lncRNAs and mRNAs in the control, HFD, and HFD + RSV groups are listed in Supplementary Tables S1 and S2. [file 2539519.f1.zip]

Archive with 2 entries (2 files):
- 2539519.f1/Supplementary Table 1.pdf
- 2539519.f1/Supplementary Table 2.pdf
